# Supplementary material for: RNA-Seq Analyses Reveal That Endothelial Activation and Fibrosis Are Induced Early and Progressively by Besnoitia besnoiti Host Cell Invasion and Proliferation
Source: Front Cell Infect Microbiol. 2020 May 15;10:218. doi: 10.3389/fcimb.2020.00218 (PMC7242738; doi:10.3389/fcimb.2020.00218)
Supplement: Supplementary Table 9 — Expression profile of selected families of B. besnoiti genes (dense granules, GRA; calcium dependent protein kinases, CDPKs; AP2 transcription factors and Aspartyl proteases, ASP). [file Table_9.XLSX]

## Sheet: GRA
Identifier	Blast 2GO	pValue	fdr	isPresent	log2 Ratio	12hpi-1 [normalized count]	32hpi-1 [normalized count]	12hpi-2 [normalized count]	32hpi-2 [normalized count]	12hpi-3 [normalized count]	32hpi-3 [normalized count]	12hpi-4 [normalized count]	32hpi-4 [normalized count]	12hpi-1 [FPKM]	32hpi-1 [FPKM]	12hpi-2 [FPKM]	32hpi-2 [FPKM]	12hpi-3 [FPKM]	32hpi-3 [FPKM]	12hpi-4 [FPKM]	32hpi-4 [FPKM]
augustus_masked-95-processed-gene-1.10-mRNA-1	dense granule protein GRA1	0.07797	0.4816	TRUE	0.3212	9200	9175	10500	12250	8216	11750	9934	14000	29550	29300	35820	34060	29660	35180	30520	38870
maker-57-augustus-gene-0.48-mRNA-1	dense granule protein DG32	0.09657	0.5269	TRUE	-0.3723	2850	1798	2056	1646	1410	1480	2614	1962	4200	2634	3218	2100	2334	2033	3684	2499
maker-18-augustus-gene-0.36-mRNA-1	dense granule protein GRA12	0.106	0.5396	TRUE	0.3574	463.8	495.2	472.9	525.8	292.1	454.5	412.5	561.3	678.5	720.3	735.1	666.1	480.2	619.8	577.2	709.9
maker-47-augustus-gene-0.49-mRNA-1	dense granule protein GRA9	0.2671	0.7482	TRUE	0.2395	837.8	760.5	691.2	1046	646.1	1037	1048	1008	1575	1421	1380	1703	1365	1817	1885	1639
maker-18-augustus-gene-4.61-mRNA-1	dense granule protein DG32	0.3957	0.8313	TRUE	0.1626	935	900	636.7	872.8	854.1	1039	956	1041	2501	2393	1809	2022	2567	2591	2446	2407
augustus_masked-45-processed-gene-1.47-mRNA-1	dense granule protein GRA7	0.4169	0.8364	TRUE	0.1537	2910	2859	3493	3970	3771	3747	3300	4407	6982	6821	8904	8249	10170	8383	7574	9143
maker-60-augustus-gene-0.22-mRNA-1	dense granule protein GRA10	0.8314	0.9681	TRUE	-0.1472	14.96	17.69	0	10.52	26.55	18.79	11.32	10.48	10.44	12.27	0	6355	20.82	12.22	7558	6323
augustus_masked-40-processed-gene-2.6-mRNA-1	dense granule protein GRA12	0.9588	0.9938	TRUE	-0.01097	830.3	766.4	982.3	1088	1224	975.8	791	984	1465	1345	1842	1663	2427	1606	1335	1501

## Sheet: CDPKs
Identifier	Blast 2GO	pValue	fdr	isPresent	log2 Ratio	12hpi-1 [normalized count]	32hpi-1 [normalized count]	12hpi-2 [normalized count]	32hpi-2 [normalized count]	12hpi-3 [normalized count]	32hpi-3 [normalized count]	12hpi-4 [normalized count]	32hpi-4 [normalized count]	12hpi-1 [FPKM]	32hpi-1 [FPKM]	12hpi-2 [FPKM]	32hpi-2 [FPKM]	12hpi-3 [FPKM]	32hpi-3 [FPKM]	12hpi-4 [FPKM]	32hpi-4 [FPKM]
maker-13-augustus-gene-0.31-mRNA-1	calcium-dependent protein kinase 1 (TgCDPK1), chain A	0.008672	0.1577	TRUE	0.5215	613.4	941.3	600.3	977.9	575.3	968.8	855.7	970	735.9	1123	765.2	1016	775.8	1084	982	1006
augustus_masked-1-processed-gene-4.4-mRNA-1	calcium-dependent kinase CDPK6	0.02366	0.2684	TRUE	-1	164.6	94.33	127.3	68.35	274.4	76.33	32.35	63.46	76.09	43.36	62.55	27.37	142.6	32.91	14.31	25.37
maker-16-augustus-gene-0.23-mRNA-1	calcium-dependent kinase CDPK3	0.1457	0.6145	TRUE	0.3371	254.3	349.8	254.7	336.5	274.4	398.1	381.8	426.8	282.8	386.7	300.9	324	342.9	412.7	406	410.3
maker-13-augustus-gene-1.20-mRNA-1	calcium-dependent kinase CDPK4	0.3932	0.8309	TRUE	-0.3213	89.76	58.95	127.3	36.8	50.89	57.54	58.23	62.3	42.15	27.52	63.52	14.97	26.86	25.19	26.15	25.29
maker-5-augustus-gene-0.23-mRNA-1	calcium-dependent kinase CDPK2A	0.5161	0.8899	TRUE	0.2073	134.6	133.6	36.38	105.2	123.9	95.12	82.5	131.6	104.9	103.5	30.12	70.97	108.5	69.11	61.5	88.66
maker-39-augustus-gene-3.41-mRNA-1	calcium-dependent kinase CDPK2	0.6596	0.9319	TRUE	0.217	7.48	41.27	72.76	36.8	55.32	35.23	17.79	44.25	6387	35.03	66.01	27.22	53.09	28.05	14.53	32.67
maker-39-augustus-gene-0.45-mRNA-1	calcium-dependent kinase CDPK5	0.6613	0.9319	TRUE	-0.2328	22.44	27.51	36.38	5258	44.26	27.01	24.26	38.43	18.64	22.72	32.1	3782	41.31	20.91	19.28	27.59
augustus_masked-1-processed-gene-7.2-mRNA-1	calcium-dependent kinase CDPK9	0.9233	0.9889	TRUE	0.0286	142.1	114	181.9	157.7	139.4	117.4	88.97	139.2	132.3	105.5	180	127.2	145.9	101.9	79.24	112

## Sheet: AP2
Identifier	Blast 2GO	pValue	fdr	isPresent	log2 Ratio	12hpi-1 [normalized count]	32hpi-1 [normalized count]	12hpi-2 [normalized count]	32hpi-2 [normalized count]	12hpi-3 [normalized count]	32hpi-3 [normalized count]	12hpi-4 [normalized count]	32hpi-4 [normalized count]	12hpi-1 [FPKM]	32hpi-1 [FPKM]	12hpi-2 [FPKM]	32hpi-2 [FPKM]	12hpi-3 [FPKM]	32hpi-3 [FPKM]	12hpi-4 [FPKM]	32hpi-4 [FPKM]
augustus_masked-51-processed-gene-0.12	AP2 domain transcription factor AP2IV-1	0.522	0.8917	TRUE	-0.3504	14.96	25.55	18.19	15.77	24.34	19.96	37.21	20.96	22.88	38.84	29.56	20.89	41.83	28.46	54.42	27.71
augustus_masked-10-processed-gene-3.23	AP2 domain transcription factor AP2IV-4	0.3962	0.8313	TRUE	0.3404	59.84	55.02	0	52.58	55.32	58.71	48.53	72.78	16.89	15.44	0	12.85	17.54	15.45	13.1	17.76
maker-50-augustus-gene-0.30	AP2 domain transcription factor AP2IX-1	0.6064	0.9118	TRUE	0.1795	44.88	133.6	200.1	68.35	97.36	92.77	79.26	115.9	26.98	79.86	127.8	35.58	65.77	51.99	45.57	60.21
augustus_masked-41-processed-gene-6.29	AP2 domain transcription factor AP2IX-6	0.8093	0.9637	TRUE	0.09354	74.8	39.3	36.38	78.86	50.89	58.71	46.91	54.73	109.7	57.3	56.68	100.2	83.88	80.28	65.8	69.39
maker-16-augustus-gene-0.27	AP2 domain transcription factor AP2IX-8	0.02906	0.2993	TRUE	-0.7587	187	88.43	145.5	52.58	128.3	73.98	66.32	71.03	53.13	24.98	43.92	12.94	40.98	19.6	18.02	17.45
augustus_masked-71-processed-gene-0.12	AP2 domain transcription factor AP2IX-9	0.1468	0.6162	TRUE	-0.5911	52.36	43.23	72.76	57.83	92.94	37.58	38.82	37.26	23.76	19.5	35.08	22.73	47.39	15.9	16.85	14.62
maker-101-augustus-gene-0.25	AP2 domain transcription factor AP2VIIa-3	0.6182	0.9146	TRUE	0.1228	291.7	233.9	218.3	205	170.4	256	218.4	249.8	182.6	145.5	145.2	111.1	119.8	149.4	130.7	135.2
maker-43-augustus-gene-4.48	AP2 domain transcription factor AP2VIIa-4	0.1985	0.6835	TRUE	-0.4381	112.2	135.6	109.1	63.09	172.6	75.16	87.35	84.42	20.93	25.15	21.63	10.19	36.19	13.07	15.59	13.62
maker-43-augustus-gene-4.49	AP2 domain transcription factor AP2VIIa-5	0.2437	0.7278	TRUE	-0.5475	89.76	100.2	18.19	57.83	188.1	54.02	38.82	43.67	23.64	26.24	5.09	13.19	55.67	13.26	9781	9944
maker-58-augustus-gene-0.55	AP2 domain transcription factor AP2VIIa-7	0.006429	0.1323	TRUE	-1244	52.36	49.13	72.76	47.32	130.6	21.14	45.29	22.71	9.86	9198	14.56	7717	27.63	3711	8158	3697
maker-24-augustus-gene-0.42	AP2 domain transcription factor AP2VIIb-2	0.5883	0.9081	TRUE	0.2641	29.92	39.3	18.19	26.29	33.19	29.36	22.65	33.77	39.06	51.02	25.23	29.72	48.7	35.74	28.28	38.12
maker-52-augustus-gene-0.23	AP2 domain transcription factor AP2VIIb-3	0.5957	0.909	TRUE	-0.2398	44.88	78.61	72.76	15.77	104	64.59	33.97	47.74	11.41	19.88	19.66	3474	29.73	15.32	8264	10.5
augustus_masked-69-processed-gene-1.16	AP2 domain transcription factor AP2VIII-2	0.02343	0.2668	TRUE	-1284	29.92	29.48	18.19	26.29	119.5	17.61	21.03	17.47	7544	7389	4873	5.74	33.86	4.14	5071	3807
maker-44-augustus-gene-0.38	AP2 domain transcription factor AP2VIII-3	0.005484	0.121	TRUE	-0.8789	194.5	98.26	127.3	68.35	276.6	105.7	131	126.9	49.23	24.73	34.25	14.98	78.69	24.94	31.72	27.78
maker-1-augustus-gene-8.59	AP2 domain transcription factor AP2VIII-4	0.2174	0.7023	TRUE	-0.7437	67.32	27.51	0	15.77	42.04	24.66	12.94	9898	11.27	4579	0	2287	7.91	3849	2072	1433
augustus_masked-85-processed-gene-0.9	AP2 domain transcription factor AP2VIII-6	0.5846	0.9069	TRUE	-0.1651	291.7	180.8	90.95	173.5	258.9	186.7	122.9	167.1	96.46	59.44	31.95	49.69	96.21	57.56	38.88	47.77
maker-60-augustus-gene-0.35	AP2 domain transcription factor AP2VIII-7	0.7713	0.9602	TRUE	-0.08407	179.5	182.8	109.1	184	289.9	210.2	152.1	160.1	129	130.5	83.31	114.5	234.1	140.8	104.5	99.46
maker-74-augustus-gene-0.50	AP2 domain transcription factor AP2X-11	0.177	0.662	TRUE	-0.6874	14.96	21.62	36.38	15.77	46.47	19.96	32.35	24.45	6208	8918	16.04	5669	21.67	7724	12.84	8773
maker-18-augustus-gene-4.91	AP2 domain transcription factor AP2X-4	0.4816	0.8735	TRUE	-0.3522	44.88	35.37	18.19	21.03	50.89	25.83	19.41	25.62	28.18	22.08	12.13	11.43	35.91	15.12	11.66	13.91
maker-23-augustus-gene-1.29	AP2 domain transcription factor AP2X-5	0.1624	0.6427	TRUE	0.5203	29.92	135.6	72.76	99.9	95.15	106.9	67.94	63.46	8425	37.96	21.77	24.36	30.11	28.05	18.3	15.45
maker-23-augustus-gene-1.49	AP2 domain transcription factor AP2X-6	0.7513	0.9554	TRUE	0.1273	22.44	51.09	72.76	68.35	66.38	66.94	45.29	41.92	19.63	44.44	67.63	51.78	65.26	54.59	37.9	31.71
maker-23-augustus-gene-4.44	AP2 domain transcription factor AP2X-8	0.09735	0.5281	TRUE	-0.8688	22.44	53.06	54.57	42.06	159.3	34.05	25.88	27.95	3573	8398	9231	5799	28.51	5055	3941	3847
maker-54-augustus-gene-0.36	AP2 domain transcription factor AP2X-9	0.6006	0.9096	TRUE	-0.2393	74.8	80.57	90.95	26.29	48.68	54.02	37.21	25.04	25.34	27.14	32.74	7713	18.53	17.06	12.06	7333
maker-37-augustus-gene-1.56	AP2 domain transcription factor AP2XI-4	0.7998	0.9637	TRUE	-0.1437	22.44	29.48	0	15.77	77.45	31.71	22.65	51.24	3953	5162	0	2406	15.33	5207	3816	7803
augustus_masked-9-processed-gene-0.22	AP2 domain transcription factor AP2XI-5	0.7026	0.9441	TRUE	-0.1766	29.92	29.48	18.19	26.29	50.89	35.23	35.59	39.01	18.48	18.1	11.94	14.06	35.32	20.29	21.02	20.83
augustus_masked-1-processed-gene-3.20	AP2 domain transcription factor AP2XII-1	0.04512	0.3746	TRUE	-0.7768	74.8	84.5	90.95	57.83	221.3	76.33	69.56	61.13	17.51	19.67	22.62	11.73	58.22	16.66	15.58	12.37
maker-49-augustus-gene-0.37	AP2 domain transcription factor AP2XII-2	0.2593	0.742	TRUE	0.6495	14.96	35.37	0	21.03	22.13	28.18	19.41	26.2	7.85	18.45	0	9557	13.05	13.79	9743	11.89
maker-94-augustus-gene-0.50	AP2 domain transcription factor AP2XII-4	0.01803	0.2333	TRUE	-1336	52.36	43.23	18.19	10.52	128.3	18.79	21.03	20.96	7716	6334	2848	1342	21.25	2581	2964	2.67
maker-94-augustus-gene-0.49	AP2 domain transcription factor AP2XII-5	0.4957	0.8797	TRUE	0.4173	52.36	23.58	18.19	26.29	17.7	24.66	4853	28.53	20.14	9016	7432	8755	7651	8842	1785	9486
maker-66-augustus-gene-0.63	AP2 domain transcription factor AP2XII-8	0.0426	0.3614	TRUE	-0.9506	104.7	68.78	54.57	31.55	183.7	50.49	27.5	46	35.98	23.49	19.92	9387	70.92	16.18	9037	13.66
maker-1-augustus-gene-6.28-	AP2 domain transcription factor AP2X-6	6.259e-10	2.486e-06	TRUE	1.823	374	1419	691.2	2077	360.7	2002	740.9	2063	1774	6691	3483	8531	1923	8854	3361	8461

## Sheet: ASP
Identifier	Blast 2GO	pValue	fdr	isPresent	log2 Ratio	12hpi-1 [normalized count]	32hpi-1 [normalized count]	12hpi-2 [normalized count]	32hpi-2 [normalized count]	12hpi-3 [normalized count]	32hpi-3 [normalized count]	12hpi-4 [normalized count]	32hpi-4 [normalized count]	12hpi-1 [FPKM]	32hpi-1 [FPKM]	12hpi-2 [FPKM]	32hpi-2 [FPKM]	12hpi-3 [FPKM]	32hpi-3 [FPKM]	12hpi-4 [FPKM]	32hpi-4 [FPKM]
maker-34-augustus-gene-0.76	aspartyl protease ASP1	0.1294	0.5922	TRUE	-0.6869	29.92	23.58	90.95	31.55	44.26	22.31	35.59	30.86	44.52	34.89	143.8	40.65	74.01	30.95	50.65	39.7
maker-20-augustus-gene-3.69	aspartyl protease ASP3	0.1603	0.6412	TRUE	0.3279	374	530.6	727.6	494.2	356.3	607.1	475.6	660.2	328.1	462.8	678.2	375.5	351.3	496.6	399.1	500.8
maker-26-augustus-gene-0.32	aspartyl protease ASP5	0.729	0.9486	TRUE	-0.1426	44.88	45.2	18.19	47.32	77.45	42.27	50.15	61.13	28.86	28.9	12.43	26.36	55.98	25.35	30.85	33.99
