# Supplementary material for: RNA-Seq Analyses Reveal That Endothelial Activation and Fibrosis Are Induced Early and Progressively by Besnoitia besnoiti Host Cell Invasion and Proliferation
Source: Front Cell Infect Microbiol. 2020 May 15;10:218. doi: 10.3389/fcimb.2020.00218 (PMC7242738; doi:10.3389/fcimb.2020.00218)
Supplement: Supplementary Table 10 — Differentially Expressed Genes (DEGs) mapped to Besnoitia besnoiti at 32 vs. 12 hpi comparison. Positive fold-change values indicate gene upregulation in infected BAEC at 32 hpi. [file Table_10.XLSX]

## Sheet: Table S10 32 hpi vs 12 hpi Besn
Identifier	Blast2GO description	#Hits	e-value	Mean similarity	#GO	GO IDs	GO Names	Enzyme Names	Enzyme Codes	InterPro IDs	InterPro GO IDs	InterPro GO Names	N. caninum ID	N. caninum protein description	N. caninum protein length	T. gondii ID	T. gondii protein description	T. gondii protein length	P. falciparum ID	P. falciparum protein description	P. falciparum protein length	Conservation status	strand	seqid	description	start	end	gc	width	pValue	fdr	isPresent	log2 Ratio	Fold change (FC)	12hpi-1 [normalized count]	32hpi-1 [normalized count]	12hpi-2 [normalized count]	32hpi-2 [normalized count]	12hpi-3 [normalized count]	32hpi-3 [normalized count]	12hpi-4 [normalized count]	32hpi-4 [normalized count]	12hpi-1 [FPKM]	32hpi-1 [FPKM]	12hpi-2 [FPKM]	32hpi-2 [FPKM]	12hpi-3 [FPKM]	32hpi-3 [FPKM]	12hpi-4 [FPKM]
augustus_masked-19-processed-gene-1.1-	GMC oxidoreductase	20	5.72409e-102	71.35	3	F:GO:0016614; F:GO:0050660; P:GO:0055114	F:oxidoreductase activity, acting on CH-OH group of donors; F:flavin adenine dinucleotide binding; P:oxidation-reduction process			IPR007867 (PFAM); IPR023753 (G3DSA:3.50.50.GENE3D); PTHR11552 (PANTHER); IPR023753 (SUPERFAMILY); SSF54373 (SUPERFAMILY)	F:GO:0016614; F:GO:0016491; P:GO:0055114	F:oxidoreductase activity, acting on CH-OH group of donors; F:oxidoreductase activity; P:oxidation-reduction process	NCLIV_018360	glucose-methanol-choline domain-containing protein	976	TGME49_243655	GMC oxidoreductase	759	NA			Partially conserved	-	19	NA	197335	201790	0.5251	1377	0.04929	0.004883	TRUE	3.031	8.17376	0	31.44	18.19	36.8	2213	46.97	6471	40.17	0	41.35	25.56	42.16	3289	57.92	8186
augustus_masked-74-processed-gene-1.43-	SRS domain-containing	20	7.6972e-34	46.7	1	C:GO:0016020	C:membrane			IPR007226 (PFAM); SIGNAL_PEPTIDE_N_REGION (PHOBIUS); SIGNAL_PEPTIDE_C_REGION (PHOBIUS); NON_CYTOPLASMIC_DOMAIN (PHOBIUS); SIGNAL_PEPTIDE (PHOBIUS); SIGNAL_PEPTIDE_H_REGION (PHOBIUS); SignalP-TM (SIGNALP_GRAM_POSITIVE); SignalP-noTM (SIGNALP_EUK); IPR007226 (SUPERFAMILY)	C:GO:0016020	C:membrane	NCLIV_052740	SRS domain-containing protein	330	TGME49_329710	SAG-related sequence SRS26I (SRS26I)	487	NA			Partially conserved	-	74	NA	473309	474355	0.5435	1047	0.0008579	0.03744	TRUE	2.896	7.4436	7.48	23.58	0	21.03	2213	25.83	3235	29.11	13.01	40.78	0	31.68	4326	41.9	5383
augustus_masked-38-processed-gene-3.7-	SRS domain-containing	20	1.3124e-48	56.35	1	C:GO:0016020	C:membrane			IPR028352 (PRINTS); IPR007226 (PFAM); IPR007226 (G3DSA:2.60.40.GENE3D); NON_CYTOPLASMIC_DOMAIN (PHOBIUS); TRANSMEMBRANE (PHOBIUS); CYTOPLASMIC_DOMAIN (PHOBIUS); IPR007226 (SUPERFAMILY); IPR007226 (SUPERFAMILY); IPR007226 (SUPERFAMILY)	C:GO:0016020	C:membrane	NCLIV_038900	SRS domain-containing protein	384	TGME49_315740	SAG-related sequence SRS54 (SRS54)	389	NA			Partially conserved	+	38	NA	677554	680852	0.5354	1272	0.01255	0.002285	TRUE	2.786	6.89715	14.96	39.3	0	52.58	8851	62.24	4853	49.49	21.42	55.95	0	65.2	14.24	83.09	6646
maker-68-augustus-gene-0.65-	SAG-related sequence SRS22A	20	1.15477e-08	44.45	1	C:GO:0016020	C:membrane			no IPS match	no IPS match	no IPS match	NCLIV_015720	hypothetical protein	191	TGME49_238470	SAG-related sequence SRS22C (SRS22C)	186	NA			Partially conserved	+	68	NA	284941	286580	0.5615	837	0.06712	0.005925	TRUE	2.692	6.46209	7.48	25.55	0	68.35	8851	57.54	6471	37.84	16.28	55.27	0	128.8	21.65	116.7	13.47
augustus_masked-54-processed-gene-0.17-	SRS domain-containing	20	4.69344e-63	54.7	1	C:GO:0016020	C:membrane			IPR028352 (PRINTS); IPR007226 (G3DSA:2.60.40.GENE3D); IPR007226 (G3DSA:2.60.40.GENE3D); IPR007226 (PFAM); SIGNAL_PEPTIDE (PHOBIUS); SIGNAL_PEPTIDE_H_REGION (PHOBIUS); SIGNAL_PEPTIDE_N_REGION (PHOBIUS); NON_CYTOPLASMIC_DOMAIN (PHOBIUS); SIGNAL_PEPTIDE_C_REGION (PHOBIUS); SignalP-TM (SIGNALP_GRAM_POSITIVE); IPR007226 (SUPERFAMILY); IPR007226 (SUPERFAMILY)	C:GO:0016020	C:membrane	NCLIV_004411	SRS domain-containing protein	386	TGME49_321470	SAG-related sequence SRS12D (SRS12D)	398	NA			Partially conserved	+	54	NA	145274	146383	0.5523	1110	0.04942	0.004883	TRUE	2.585	6.00016	14.96	47.16	0	52.58	0	49.32	14.56	53.57	24.55	76.94	0	74.71	0	75.45	22.85
maker-54-augustus-gene-0.44-	SRS domain-containing	20	2.70365e-17	54.75	1	C:GO:0016020	C:membrane			IPR028352 (PRINTS); IPR007226 (G3DSA:2.60.40.GENE3D); IPR007226 (PFAM); SIGNAL_PEPTIDE_N_REGION (PHOBIUS); SIGNAL_PEPTIDE (PHOBIUS); SIGNAL_PEPTIDE_H_REGION (PHOBIUS); SIGNAL_PEPTIDE_C_REGION (PHOBIUS); NON_CYTOPLASMIC_DOMAIN (PHOBIUS); SignalP-noTM (SIGNALP_EUK); SignalP-TM (SIGNALP_GRAM_POSITIVE); SignalP-noTM (SIGNALP_GRAM_NEGATIVE); IPR007226 (SUPERFAMILY)	C:GO:0016020	C:membrane	NCLIV_004450	SRS domain-containing protein	385	TGME49_301160	SAG-related sequence SRS19C (SRS7)	396	PF3D7_0604800	RAP protein, putative	1434	Fully conserved	+	54	NA	153473	157049	0.5392	1545	1.54e-08	0.01224	TRUE	2.326	5.01413	7.48	147.4	18.19	199.8	22.13	182	58.23	145.6	8818	172.7	22.78	204	29.32	200.1	65.66
maker-68-augustus-gene-0.51-	SRS domain-containing	20	1.32781e-16	63.8	1	C:GO:0016020	C:membrane			IPR007226 (G3DSA:2.60.40.GENE3D); IPR007226 (PFAM); SignalP-TM (SIGNALP_GRAM_POSITIVE); IPR007226 (SUPERFAMILY)	C:GO:0016020	C:membrane	NCLIV_015870	SRS domain-containing protein	300	TGME49_239090	SAG-related sequence SRS23 (SRS23)	294	NA			Partially conserved	+	68	NA	54922	56350	0.5804	1182	0.01265	0.002285	TRUE	2.295	4.90754	7.48	78.61	0	78.86	8851	59.89	27.5	90.25	11.53	120.4	0	105.2	15.33	86.04	40.53
augustus_masked-38-processed-gene-3.20-	SRS domain-containing	20	5.59257e-77	59.65	1	C:GO:0016020	C:membrane			IPR028352 (PRINTS); IPR007226 (PFAM); IPR007226 (G3DSA:2.60.40.GENE3D); NON_CYTOPLASMIC_DOMAIN (PHOBIUS); SIGNAL_PEPTIDE_H_REGION (PHOBIUS); SIGNAL_PEPTIDE_C_REGION (PHOBIUS); SIGNAL_PEPTIDE_N_REGION (PHOBIUS); SIGNAL_PEPTIDE (PHOBIUS); IPR007226 (SUPERFAMILY); IPR007226 (SUPERFAMILY)	C:GO:0016020	C:membrane	NCLIV_038900	SRS domain-containing protein	384	TGME49_267140	SAG-related sequence SRS38B (SRS38B)	390	NA			Partially conserved	+	38	NA	740280	741416	0.5303	1137	0.0003837	0.02117	TRUE	2.198	4.58843	14.96	35.37	18.19	47.32	4426	39.93	9706	45.41	23.96	56.33	30.96	65.64	7967	59.63	14.87
maker-1-augustus-gene-6.28-	---NA---									IPR014044 (G3DSA:3.40.33.GENE3D); SIGNAL_PEPTIDE (PHOBIUS); SIGNAL_PEPTIDE_H_REGION (PHOBIUS); NON_CYTOPLASMIC_DOMAIN (PHOBIUS); SIGNAL_PEPTIDE_N_REGION (PHOBIUS); SIGNAL_PEPTIDE_C_REGION (PHOBIUS); SignalP-noTM (SIGNALP_GRAM_NEGATIVE); SignalP-TM (SIGNALP_GRAM_POSITIVE); SignalP-noTM (SIGNALP_EUK); IPR014044 (SUPERFAMILY); TMhelix (TMHMM)	no GO terms	no GO terms	NCLIV_051180	hypothetical protein	525	TGME49_237425	AP2 domain transcription factor AP2X-6 (AP2X6)	4495	NA			Partially conserved	+	1	NA	1190460	1191904	0.5234	384	6.259e-10	2.486e-06	TRUE	1.823	3.53816	374	1419	691.2	2077	360.7	2002	740.9	2063	1774	6691	3483	8531	1923	8854	3361
augustus_masked-74-processed-gene-1.12-	SRS domain-containing	17	4.82743e-18	48.18	1	C:GO:0016020	C:membrane			NON_CYTOPLASMIC_DOMAIN (PHOBIUS); SIGNAL_PEPTIDE_N_REGION (PHOBIUS); SIGNAL_PEPTIDE_H_REGION (PHOBIUS); SIGNAL_PEPTIDE_C_REGION (PHOBIUS); SIGNAL_PEPTIDE (PHOBIUS); SignalP-noTM (SIGNALP_EUK); SignalP-TM (SIGNALP_GRAM_POSITIVE); SignalP-noTM (SIGNALP_GRAM_NEGATIVE)	no GO terms	no GO terms	NCLIV_052670	SRS domain-containing protein	359	TGME49_315390	SAG-related sequence SRS53C (SRS53C)	317	NA			Partially conserved	+	74	NA	287969	289153	0.5595	1185	0.0003199	0.01815	TRUE	1.771	3.4129	14.96	74.68	0	68.35	15.49	51.67	27.5	68.12	22.99	114.1	0	90.98	26.76	74.04	40.43
augustus_masked-74-processed-gene-1.30-	SRS domain-containing	5	5.24952e-06	41.8	1	C:GO:0016020	C:membrane			SIGNAL_PEPTIDE_C_REGION (PHOBIUS); SIGNAL_PEPTIDE (PHOBIUS); NON_CYTOPLASMIC_DOMAIN (PHOBIUS); SIGNAL_PEPTIDE_N_REGION (PHOBIUS); SIGNAL_PEPTIDE_H_REGION (PHOBIUS); SignalP-TM (SIGNALP_GRAM_POSITIVE); SignalP-noTM (SIGNALP_EUK); TMhelix (TMHMM)	no GO terms	no GO terms	NCLIV_068873	SRS domain-containing protein	354	TGME49_315410	SAG-related sequence SRS53F (SRS53F)	322	NA			Partially conserved	-	74	NA	355757	357289	0.5297	1533	0.01965	0.002788	TRUE	1.586	3.00216	29.92	94.33	90.95	157.7	39.83	135	35.59	111.8	35.55	111.4	114.8	162.3	53.18	149.6	40.44
augustus_masked-4-processed-gene-4.24-	---NA---									no IPS match	no IPS match	no IPS match	NCLIV_025120	unspecified product	704	TGME49_262730	rhoptry protein ROP16 (ROP16)	707	NA			Partially conserved	-	4	NA	963647	964300	0.5765	654	0.02179	0.002872	TRUE	1.566	2.96083	14.96	106.1	72.76	136.7	30.98	111.6	55	135.7	41.66	293.8	215.3	329.7	96.96	289.7	146.5
augustus_masked-38-processed-gene-3.4-	SRS domain-containing	20	5.23287e-70	55.6	1	C:GO:0016020	C:membrane			IPR028352 (PRINTS); IPR007226 (G3DSA:2.60.40.GENE3D); IPR007226 (PFAM); NON_CYTOPLASMIC_DOMAIN (PHOBIUS); TRANSMEMBRANE (PHOBIUS); TRANSMEMBRANE (PHOBIUS); CYTOPLASMIC_DOMAIN (PHOBIUS); CYTOPLASMIC_DOMAIN (PHOBIUS); IPR007226 (SUPERFAMILY); IPR007226 (SUPERFAMILY); TMhelix (TMHMM)	C:GO:0016020	C:membrane	NCLIV_038900	SRS domain-containing protein	384	TGME49_267160	SAG-related sequence SRS38D (SRS38D)	389	NA			Partially conserved	+	38	NA	668305	669444	0.5149	1140	0.04768	0.004883	TRUE	1.52	2.86791	22.44	178.8	127.3	210.3	50.89	249	144	337.1	35.85	284	216.1	291	91.38	370.8	220
augustus_masked-99-processed-gene-0.31-	SAG-related sequence SRS38C	20	7.98078e-74	56.4	1	C:GO:0016020	C:membrane			IPR028352 (PRINTS); IPR007226 (G3DSA:2.60.40.GENE3D); IPR007226 (PFAM); CYTOPLASMIC_DOMAIN (PHOBIUS); TRANSMEMBRANE (PHOBIUS); NON_CYTOPLASMIC_DOMAIN (PHOBIUS); IPR007226 (SUPERFAMILY); IPR007226 (SUPERFAMILY); TMhelix (TMHMM)	C:GO:0016020	C:membrane	NCLIV_038900	SRS domain-containing protein	384	TGME49_267140	SAG-related sequence SRS38B (SRS38B)	390	NA			Partially conserved	-	99	NA	184535	185644	0.5414	1110	0.02281	0.002872	TRUE	1.486	2.80111	74.8	171	72.76	147.2	42.04	211.4	108.4	301	122.7	278.9	126.8	209.2	77.53	323.4	170.1
maker-42-augustus-gene-0.52-	transmembrane	20	0	54.85	1	C:GO:0016021	C:integral component of membrane			Coil (COILS); NON_CYTOPLASMIC_DOMAIN (PHOBIUS); CYTOPLASMIC_DOMAIN (PHOBIUS); TRANSMEMBRANE (PHOBIUS); NON_CYTOPLASMIC_DOMAIN (PHOBIUS); CYTOPLASMIC_DOMAIN (PHOBIUS); NON_CYTOPLASMIC_DOMAIN (PHOBIUS); TRANSMEMBRANE (PHOBIUS); NON_CYTOPLASMIC_DOMAIN (PHOBIUS); TRANSMEMBRANE (PHOBIUS); CYTOPLASMIC_DOMAIN (PHOBIUS); TRANSMEMBRANE (PHOBIUS); TRANSMEMBRANE (PHOBIUS); TRANSMEMBRANE (PHOBIUS); TMhelix (…	no GO terms	no GO terms	NCLIV_064520	conserved hypothetical protein	1331	TGME49_300220	hypothetical protein	1823	NA			Partially conserved	-	42	NA	145531	155325	0.5583	5268	0.001595	0.0005361	TRUE	1.433	2.70008	67.32	161.1	72.76	184	68.6	196.1	61.47	172.3	23.28	55.39	26.73	55.1	26.65	63.21	20.33
augustus_masked-15-processed-gene-3.1-	rhoptry kinase family ROP40 (incomplete catalytic triad)	20	4.62528e-64	50.9	11	F:GO:0005524; P:GO:0044409; C:GO:0020008; C:GO:0016020; F:GO:0004672; P:GO:0016310; F:GO:0016772; C:GO:0005576; P:GO:0006468; F:GO:0016301; C:GO:0020005	F:ATP binding; P:entry into host; C:rhoptry; C:membrane; F:protein kinase activity; P:phosphorylation; F:transferase activity, transferring phosphorus-containing groups; C:extracellular region; P:protein phosphorylation; F:kinase activity; C:symbiont-containing vacuole membrane			IPR027916 (PFAM); SIGNAL_PEPTIDE_N_REGION (PHOBIUS); SIGNAL_PEPTIDE (PHOBIUS); SIGNAL_PEPTIDE_C_REGION (PHOBIUS); SIGNAL_PEPTIDE_H_REGION (PHOBIUS); NON_CYTOPLASMIC_DOMAIN (PHOBIUS); SignalP-noTM (SIGNALP_EUK)	no GO terms	no GO terms	NCLIV_012920	unspecified product	391	TGME49_291960	rhoptry kinase family protein ROP40 (incomplete catalytic triad) (ROP40)	525	NA			Partially conserved	+	15	NA	600268	601818	0.5577	1551	0.01886	0.002775	TRUE	1.406	2.65001	112.2	233.9	54.57	410.1	79.66	378.1	200.6	293.4	131.8	273	68.09	417.1	105.1	414	225.3
augustus_masked-4-processed-gene-3.7-	SAG-related sequence SRS40F	20	7.31335e-69	56.1	1	C:GO:0016020	C:membrane			IPR028352 (PRINTS); IPR007226 (PFAM); IPR007226 (G3DSA:2.60.40.GENE3D); SIGNAL_PEPTIDE_H_REGION (PHOBIUS); NON_CYTOPLASMIC_DOMAIN (PHOBIUS); SIGNAL_PEPTIDE_C_REGION (PHOBIUS); SIGNAL_PEPTIDE_N_REGION (PHOBIUS); SIGNAL_PEPTIDE (PHOBIUS); SignalP-noTM (SIGNALP_GRAM_NEGATIVE); SignalP-TM (SIGNALP_GRAM_POSITIVE); IPR007226 (SUPERFAMILY); IPR007226 (SUPERFAMILY); TMhelix (TMHMM)	C:GO:0016020	C:membrane	NCLIV_047920	SRS domain-containing protein	395	TGME49_224750	SAG-related sequence SRS40F (SRS40F)	391	NA			Partially conserved	+	4	NA	648157	649269	0.5427	1113	0.01493	0.002372	TRUE	1.362	2.57041	89.76	247.6	109.1	273.4	68.6	301.8	182.8	370.9	146.9	402.8	189.8	387.5	126.2	460.4	286.1
augustus_masked-99-processed-gene-0.14-	SRS domain-containing	20	2.06049e-70	58.15	1	C:GO:0016020	C:membrane			IPR028352 (PRINTS); IPR007226 (PFAM); IPR007226 (G3DSA:2.60.40.GENE3D); NON_CYTOPLASMIC_DOMAIN (PHOBIUS); TRANSMEMBRANE (PHOBIUS); CYTOPLASMIC_DOMAIN (PHOBIUS); IPR007226 (SUPERFAMILY); IPR007226 (SUPERFAMILY)	C:GO:0016020	C:membrane	NCLIV_038950	SRS domain-containing protein	385	TGME49_267140	SAG-related sequence SRS38B (SRS38B)	390	NA			Partially conserved	-	99	NA	119477	120726	0.5399	978	0.0001064	0.00845	TRUE	1.339	2.52976	74.8	121.8	18.19	120.9	35.41	119.8	55	126.9	139.3	225.6	35.99	195	74.1	208	97.97
maker-37-augustus-gene-0.43-	hypothetical protein TGMAS_315750	12	2.35584e-85	67.67						no IPS match	no IPS match	no IPS match	NCLIV_058420	conserved hypothetical protein	190	TGME49_315750	hypothetical protein	231	NA			Partially conserved	-	37	NA	173654	175495	0.5406	960	0.04855	0.004883	TRUE	1.305	2.47084	97.24	273.2	72.76	341.7	92.94	264.2	215.1	416.9	184.5	515.2	146.7	561.5	198.2	467.4	390.4
maker-32-augustus-gene-1.44-	phosphatase 2C domain-containing	20	6.1694e-142	57.45	3	F:GO:0004722; C:GO:0008287; P:GO:0006470	F:protein serine/threonine phosphatase activity; C:protein serine/threonine phosphatase complex; P:protein dephosphorylation	EC:3.1.3.16; EC:3.1; EC:3.1.3.41	Protein-serine/threonine phosphatase; Acting on ester bonds; 4-nitrophenylphosphatase	IPR001932 (SMART); IPR001932 (PFAM); IPR001932 (G3DSA:3.60.40.GENE3D); PTHR13832:SF479 (PANTHER); IPR015655 (PANTHER); CYTOPLASMIC_DOMAIN (PHOBIUS); SIGNAL_PEPTIDE (PHOBIUS); NON_CYTOPLASMIC_DOMAIN (PHOBIUS); TRANSMEMBRANE (PHOBIUS); SIGNAL_PEPTIDE_C_REGION (PHOBIUS); SIGNAL_PEPTIDE_H_REGION (PHOBIUS); SIGNAL_PEPTIDE_N_REGION (PHOBIUS); IPR001932 (PROSITE_PROFILES); SignalP-noTM (SIGNALP_EUK); IP…	F:GO:0004722; F:GO:0003824; P:GO:0006470	F:protein serine/threonine phosphatase activity; F:catalytic activity; P:protein dephosphorylation	NCLIV_067490	putative protein phosphatase 2C	334	TGME49_278510	protein phosphatase 2C domain-containing protein	428	PF3D7_1455000	protein phosphatase, putative	410	Fully conserved	-	32	NA	357645	361902	0.5269	1452	1.353e-05	0.01224	TRUE	1.287	2.4402	314.2	573.8	382	814.9	232.3	743.3	273.4	660.2	394.1	715.6	509.1	885.3	327.5	869.3	328
augustus_masked-33-processed-gene-1.6-	transmembrane	20	7.16722e-90	58.95	1	C:GO:0016021	C:integral component of membrane			TRANSMEMBRANE (PHOBIUS); CYTOPLASMIC_DOMAIN (PHOBIUS); NON_CYTOPLASMIC_DOMAIN (PHOBIUS); TRANSMEMBRANE (PHOBIUS); TRANSMEMBRANE (PHOBIUS); TRANSMEMBRANE (PHOBIUS); NON_CYTOPLASMIC_DOMAIN (PHOBIUS); CYTOPLASMIC_DOMAIN (PHOBIUS); CYTOPLASMIC_DOMAIN (PHOBIUS); TMhelix (TMHMM); TMhelix (TMHMM); TMhelix (TMHMM); TMhelix (TMHMM)	no GO terms	no GO terms	NCLIV_008370	conserved hypothetical protein	239	TGME49_254070	hypothetical protein	240	PF3D7_1318000	conserved Plasmodium membrane protein, unknown function	192	Fully conserved	+	33	NA	280786	281433	0.5278	648	0.001245	0.04756	TRUE	1.284	2.43513	14.96	68.78	54.57	131.4	30.98	105.7	56.62	92.57	42.05	192.2	163	320	97.85	277	152.2
maker-13-augustus-gene-2.38-	hypothetical protein TGME49_211030	9	2.92612e-107	76.33						no IPS match	no IPS match	no IPS match	NCLIV_011830	conserved hypothetical protein	191	TGME49_211030	hypothetical protein	191	NA			Partially conserved	+	13	NA	428671	430934	0.544	579	0.05541	0.00524	TRUE	1.264	2.40161	97.24	208.3	127.3	320.7	55.32	227.8	145.6	251.5	305.9	651.5	425.6	873.7	195.6	668.1	438
maker-22-augustus-gene-2.52-	SCP family extracellular subfamily	20	2.22014e-59	61.2	1	C:GO:0005576	C:extracellular region			IPR001283 (PRINTS); IPR014044 (SMART); IPR014044 (G3DSA:3.40.33.GENE3D); IPR014044 (PFAM); IPR001283 (PANTHER); PTHR10334:SF250 (PANTHER); IPR018244 (PROSITE_PATTERNS); CYTOPLASMIC_DOMAIN (PHOBIUS); NON_CYTOPLASMIC_DOMAIN (PHOBIUS); TRANSMEMBRANE (PHOBIUS); SignalP-TM (SIGNALP_GRAM_POSITIVE); IPR014044 (SUPERFAMILY); TMhelix (TMHMM)	C:GO:0005576	C:extracellular region	NCLIV_000710	conserved hypothetical protein	221	TGME49_239890	SCP family extracellular subfamily protein	246	PF3D7_0705800	cysteine-rich secretory protein, putative	193	Fully conserved	-	22	NA	558541	561807	0.5645	822	0.01745	0.002666	TRUE	1.251	2.38006	149.6	355.7	127.3	499.5	157.1	502.6	321.9	570.6	331.5	783.5	299.8	958.4	391.2	1038	682.2
augustus_masked-67-processed-gene-0.16-	rhoptry kinase family ROP37 (incomplete catalytic triad)	20	4.88735e-34	43.8	3	F:GO:0005524; F:GO:0004672; P:GO:0006468	F:ATP binding; F:protein kinase activity; P:protein phosphorylation			IPR000719 (SMART); IPR000719 (PFAM); G3DSA:1.10.510.10 (GENE3D); IPR020636 (PANTHER); PTHR24347:SF295 (PANTHER); IPR008271 (PROSITE_PATTERNS); TRANSMEMBRANE (PHOBIUS); TRANSMEMBRANE (PHOBIUS); CYTOPLASMIC_DOMAIN (PHOBIUS); NON_CYTOPLASMIC_DOMAIN (PHOBIUS); NON_CYTOPLASMIC_DOMAIN (PHOBIUS); IPR000719 (PROSITE_PROFILES); IPR011009 (SUPERFAMILY)	F:GO:0005524; F:GO:0004672; P:GO:0006468	F:ATP binding; F:protein kinase activity; P:protein phosphorylation	NCLIV_001460	unspecified product	330	TGME49_294560	rhoptry kinase family protein ROP37 (incomplete catalytic triad) (ROP37)	776	PF3D7_1246900	RAC-beta serine/threonine protein kinase (PKB)	735	Fully conserved	+	67	NA	287460	289403	0.5468	1944	0.004777	0.001186	TRUE	1.225	2.33755	134.6	245.6	127.3	347	95.15	327.6	152.1	275.4	126.1	228.8	126.7	281.6	100.2	286.2	136.3
augustus_masked-74-processed-gene-1.38-	SRS domain-containing	20	2.89845e-29	45.85	1	C:GO:0016020	C:membrane			SIGNAL_PEPTIDE (PHOBIUS); CYTOPLASMIC_DOMAIN (PHOBIUS); SIGNAL_PEPTIDE_N_REGION (PHOBIUS); NON_CYTOPLASMIC_DOMAIN (PHOBIUS); SIGNAL_PEPTIDE_H_REGION (PHOBIUS); TRANSMEMBRANE (PHOBIUS); SIGNAL_PEPTIDE_C_REGION (PHOBIUS); SignalP-noTM (SIGNALP_EUK); IPR007226 (SUPERFAMILY)	C:GO:0016020	C:membrane	NCLIV_052761	SRS domain-containing protein	360	TGME49_329710	SAG-related sequence SRS26I (SRS26I)	487	NA			Partially conserved	-	74	NA	418968	420011	0.5163	1044	1.35e-05	0.002331	TRUE	1.222	2.3327	187	475.6	345.6	720.3	157.1	567.2	376.9	683	326.2	824.8	640.6	1088	308	922.5	628.9
maker-2-augustus-gene-2.36-	phosphorylase family	20	2.18161e-156	58.95	7	P:GO:0006769; P:GO:0006206; P:GO:0046497; P:GO:0009116; P:GO:0006144; F:GO:0004850; F:GO:0004731	P:nicotinamide metabolic process; P:pyrimidine nucleobase metabolic process; P:nicotinate nucleotide metabolic process; P:nucleoside metabolic process; P:purine nucleobase metabolic process; F:uridine phosphorylase activity; F:purine-nucleoside phosphorylase activity	EC:2.4.2.1; EC:2.4.2.3	Purine-nucleoside phosphorylase; Uridine phosphorylase	IPR000845 (PFAM); IPR000845 (G3DSA:3.40.50.GENE3D); PTHR43691:SF7 (PANTHER); PTHR43691 (PANTHER); IPR000845 (SUPERFAMILY)	F:GO:0003824; P:GO:0009116	F:catalytic activity; P:nucleoside metabolic process	NCLIV_054700	putative uridine phosphorylase	302	TGME49_310640	phosphorylase family protein	303	NA			Partially conserved	-	2	NA	517815	520904	0.5658	912	0.01087	0.00216	TRUE	1.197	2.29262	112.2	349.8	127.3	510	192.5	466.2	245.9	369.1	224.1	694.5	270.2	882.1	432.1	868	469.7
augustus_masked-1-processed-gene-0.17-	rhoptry 5B	20	4.59338e-68	51.05	3	F:GO:0005524; F:GO:0004672; P:GO:0006468	F:ATP binding; F:protein kinase activity; P:protein phosphorylation			G3DSA:3.30.200.20 (GENE3D); G3DSA:1.10.510.10 (GENE3D); IPR027916 (PFAM); SIGNAL_PEPTIDE (PHOBIUS); NON_CYTOPLASMIC_DOMAIN (PHOBIUS); SIGNAL_PEPTIDE_C_REGION (PHOBIUS); SIGNAL_PEPTIDE_N_REGION (PHOBIUS); SIGNAL_PEPTIDE_H_REGION (PHOBIUS); IPR000719 (PROSITE_PROFILES); SignalP-noTM (SIGNALP_EUK); SignalP-noTM (SIGNALP_GRAM_NEGATIVE); IPR011009 (SUPERFAMILY)	F:GO:0005524; F:GO:0004672; P:GO:0006468	F:ATP binding; F:protein kinase activity; P:protein phosphorylation	NCLIV_060730	unspecified product	549	TGME49_308093	rhoptry kinase family protein (incomplete catalytic triad)	538	PF3D7_0610600	calcium-dependent protein kinase 2 (CDPK2)	513	Fully conserved	-	1	NA	89729	91717	0.5782	1989	1.62e-06	0.0005361	TRUE	1.197	2.29262	673.2	1633	818.6	2487	624	2129	1301	1661	616.5	1487	796.4	1972	642.2	1818	1139
augustus_masked-64-processed-gene-0.27-	photosensitized INA-labeled PHIL1	20	4.78182e-105	68.35						no IPS match	no IPS match	no IPS match	NCLIV_028090	conserved hypothetical protein	165	TGME49_258410	photosensitized INA-labeled protein PHIL1 (PHIL1)	165	PF3D7_0109000	photosensitized INA-labeled protein 1, PhIL1, putative	224	Fully conserved	-	64	NA	36614	39145	0.5887	654	0.02765	0.00323	TRUE	1.179	2.2642	306.7	784.1	218.3	983.2	285.5	871.3	671.3	899	854.1	2171	645.9	2371	893.4	2262	1788
augustus_masked-20-processed-gene-1.3-	PAP2 superfamily	20	3.77649e-39	58.9	6	F:GO:0008195; P:GO:0046486; C:GO:0016020; P:GO:0009395; P:GO:0016311; P:GO:0006687	F:phosphatidate phosphatase activity; P:glycerolipid metabolic process; C:membrane; P:phospholipid catabolic process; P:dephosphorylation; P:glycosphingolipid metabolic process	EC:3.1; EC:3.1.3.4; EC:3.1.3.41	Acting on ester bonds; Phosphatidate phosphatase; 4-nitrophenylphosphatase	IPR000326 (G3DSA:1.20.144.GENE3D); IPR000326 (PFAM); PTHR10165 (PANTHER); TRANSMEMBRANE (PHOBIUS); CYTOPLASMIC_DOMAIN (PHOBIUS); CYTOPLASMIC_DOMAIN (PHOBIUS); TRANSMEMBRANE (PHOBIUS); NON_CYTOPLASMIC_DOMAIN (PHOBIUS); TRANSMEMBRANE (PHOBIUS); CYTOPLASMIC_DOMAIN (PHOBIUS); TRANSMEMBRANE (PHOBIUS); TRANSMEMBRANE (PHOBIUS); NON_CYTOPLASMIC_DOMAIN (PHOBIUS); NON_CYTOPLASMIC_DOMAIN (PHOBIUS); IPR00032…	no GO terms	no GO terms	NCLIV_063870	hypothetical protein	320	TGME49_247360	PAP2 superfamily protein	320	NA			Partially conserved	+	20	NA	237417	238376	0.5147	750	6.68e-05	0.005925	TRUE	1.172	2.25324	52.36	172.9	109.1	226.1	75.24	198.5	113.2	203.8	127.2	417.5	281.6	475.5	205.3	449.3	263
augustus_masked-99-processed-gene-0.12-	rhoptry kinase family ROP39	20	4.68986e-83	51.95	3	F:GO:0005524; F:GO:0004672; P:GO:0006468	F:ATP binding; F:protein kinase activity; P:protein phosphorylation			IPR000719 (SMART); IPR000719 (PFAM); G3DSA:1.10.510.10 (GENE3D); IPR020636 (PANTHER); IPR008271 (PROSITE_PATTERNS); CYTOPLASMIC_DOMAIN (PHOBIUS); TRANSMEMBRANE (PHOBIUS); NON_CYTOPLASMIC_DOMAIN (PHOBIUS); IPR000719 (PROSITE_PROFILES); IPR011009 (SUPERFAMILY)	F:GO:0005524; F:GO:0004672; P:GO:0006468	F:ATP binding; F:protein kinase activity; P:protein phosphorylation	NCLIV_028170	unspecified product	581	TGME49_258230	rhoptry kinase family protein ROP20 (ROP20)	552	PF3D7_1238900	protein kinase 2 (PK2)	509	Fully conserved	-	99	NA	98105	99802	0.5654	1698	0.0001011	0.008364	TRUE	1.169	2.24856	82.28	228	72.76	315.5	90.73	259.5	169.9	235.8	88.26	243.1	82.92	293	109.4	259.5	174.3
augustus_masked-34-processed-gene-0.20-	hypothetical protein TGGT1_202200	15	1.97061e-66	53.93						TRANSMEMBRANE (PHOBIUS); CYTOPLASMIC_DOMAIN (PHOBIUS); NON_CYTOPLASMIC_DOMAIN (PHOBIUS)	no GO terms	no GO terms	NCLIV_022690	conserved hypothetical protein	314	TGME49_202200	hypothetical protein	793	NA			Partially conserved	+	34	NA	314294	318823	0.533	2105	0.0004526	0.0001798	TRUE	1.155	2.22684	194.5	505	345.6	536.3	185.9	480.3	252.3	535.1	168.3	434.4	317.7	401.9	180.7	387.4	208.8
maker-19-augustus-gene-5.93-	alanine dehydrogenase	20	3.02724e-93	75.9	4	F:GO:0000286; P:GO:0006118; P:GO:0019643; P:GO:0042853	F:alanine dehydrogenase activity; P:electron transport; P:reductive tricarboxylic acid cycle; P:L-alanine catabolic process	EC:1.4.1.1	Alanine dehydrogenase	IPR007886 (SMART); IPR007698 (SMART); G3DSA:3.40.50.1770 (GENE3D); IPR007698 (PFAM); IPR007886 (PFAM); IPR016040 (G3DSA:3.40.50.GENE3D); IPR008141 (PANTHER); PTHR42795:SF1 (PANTHER); IPR016040 (SUPERFAMILY); SSF52283 (SUPERFAMILY)	F:GO:0000286; P:GO:0042853	F:alanine dehydrogenase activity; P:L-alanine catabolic process	NCLIV_058000	putative alanine dehydrogenase	390	TGME49_315260	alanine dehydrogenase	390	PF3D7_1453500	pyridine nucleotide transhydrogenase, putative	1176	Fully conserved	-	19	NA	1303606	1305247	0.5659	963	0.006798	0.0015	TRUE	1.143	2.2084	478.7	1132	636.7	1598	466.9	1365	998.1	1659	905.4	2128	1279	2618	992.4	2406	1806
maker-43-augustus-gene-3.31-	rhoptry ROP12	6	1.56001e-23	54						SIGNAL_PEPTIDE_C_REGION (PHOBIUS); SIGNAL_PEPTIDE_N_REGION (PHOBIUS); NON_CYTOPLASMIC_DOMAIN (PHOBIUS); SIGNAL_PEPTIDE (PHOBIUS); SIGNAL_PEPTIDE_H_REGION (PHOBIUS); SignalP-noTM (SIGNALP_EUK); SignalP-noTM (SIGNALP_GRAM_NEGATIVE); SignalP-TM (SIGNALP_GRAM_POSITIVE)	no GO terms	no GO terms	NCLIV_021100	unspecified product	237	TGME49_203990	rhoptry protein ROP12 (ROP12)	236	NA			Partially conserved	-	43	NA	674760	676289	0.5874	681	0.02667	0.00321	TRUE	1.131	2.1901	254.3	591.5	218.3	636.2	161.5	588.3	412.5	550.8	680.2	1573	620.3	1474	485.5	1467	1055
augustus_masked-25-processed-gene-1.28-	rhoptry kinase family ROP11 (incomplete catalytic triad)	20	6.51447e-56	48.9	3	F:GO:0005524; F:GO:0004672; P:GO:0006468	F:ATP binding; F:protein kinase activity; P:protein phosphorylation			IPR000719 (SMART); G3DSA:1.10.510.10 (GENE3D); IPR000719 (PFAM); PTHR24343 (PANTHER); PTHR24343:SF270 (PANTHER); NON_CYTOPLASMIC_DOMAIN (PHOBIUS); SIGNAL_PEPTIDE (PHOBIUS); SIGNAL_PEPTIDE_H_REGION (PHOBIUS); SIGNAL_PEPTIDE_C_REGION (PHOBIUS); SIGNAL_PEPTIDE_N_REGION (PHOBIUS); IPR000719 (PROSITE_PROFILES); SignalP-noTM (SIGNALP_EUK); IPR011009 (SUPERFAMILY)	F:GO:0005524; F:GO:0004672; P:GO:0006468	F:ATP binding; F:protein kinase activity; P:protein phosphorylation	NCLIV_045585	conserved hypothetical protein	513	TGME49_227810	rhoptry kinase family protein ROP11 (incomplete catalytic triad) (ROP11)	525	PF3D7_1123100	calcium-dependent protein kinase 7 (CDPK7)	2265	Fully conserved	+	25	NA	557319	558803	0.5785	1485	3.52e-05	0.003994	TRUE	1.125	2.18102	202	286.9	109.1	436.4	121.7	416.9	205.4	314.4	247.7	349.8	142.2	463.5	167.8	476.7	241
augustus_masked-38-processed-gene-3.40-	SRS domain-containing	20	2.6053e-62	58.1	1	C:GO:0016020	C:membrane			IPR028352 (PRINTS); IPR007226 (G3DSA:2.60.40.GENE3D); IPR007226 (PFAM); IPR007226 (SUPERFAMILY); IPR007226 (SUPERFAMILY)	C:GO:0016020	C:membrane	NCLIV_038920	SRS domain-containing protein	386	TGME49_267150	SAG-related sequence SRS38C (SRS38C)	384	NA			Partially conserved	-	38	NA	794938	796052	0.5695	1115	0.0002742	0.01729	TRUE	1.125	2.18102	59.84	180.8	181.9	315.5	101.8	246.6	160.1	329.5	97.75	293.6	315.7	446.3	186.9	375.6	250.2
augustus_masked-17-processed-gene-0.3-	alpha-galactosidase	20	1.61458e-135	48.55	2	P:GO:0005975; F:GO:0004553	P:carbohydrate metabolic process; F:hydrolase activity, hydrolyzing O-glycosyl compounds			IPR002241 (PRINTS); IPR002241 (PFAM); IPR013785 (G3DSA:3.20.20.GENE3D); IPR013780 (G3DSA:2.60.40.GENE3D); PTHR11452 (PANTHER); TRANSMEMBRANE (PHOBIUS); CYTOPLASMIC_DOMAIN (PHOBIUS); TRANSMEMBRANE (PHOBIUS); NON_CYTOPLASMIC_DOMAIN (PHOBIUS); CYTOPLASMIC_DOMAIN (PHOBIUS); IPR017853 (SUPERFAMILY); TMhelix (TMHMM); TMhelix (TMHMM)	P:GO:0005975; F:GO:0003824; F:GO:0004553	P:carbohydrate metabolic process; F:catalytic activity; F:hydrolase activity, hydrolyzing O-glycosyl compounds	NCLIV_009150	putative alpha-galactosidase A	753	TGME49_254880	Alpha-galactosidase	747	NA			Partially conserved	+	17	NA	58696	64689	0.6131	2313	0.0001665	0.0116	TRUE	1.122	2.17648	89.76	253.5	72.76	252.4	81.87	243.1	171.5	242.2	70.68	198.5	60.87	172.1	72.45	178.5	129.1
maker-18-augustus-gene-4.90-	RNA recognition motif ( or RNP domain)	20	1.05912e-60	66.1	2	F:GO:0000166; F:GO:0003676	F:nucleotide binding; F:nucleic acid binding			IPR000504 (PFAM); IPR012677 (G3DSA:3.30.70.GENE3D); IPR000504 (SUPERFAMILY)	F:GO:0003676; F:GO:0000166	F:nucleic acid binding; F:nucleotide binding	NCLIV_048410	conserved hypothetical protein	154	TGME49_224130	hypothetical protein	154	PF3D7_1310700	RNA-binding protein, putative	143	Fully conserved	-	18	NA	976979	977658	0.5975	405	0.05041	0.004883	TRUE	1.115	2.16595	1242	2445	1237	3360	765.6	3031	2383	3405	5584	10930	5910	13080	3869	12710	10250
maker-104-augustus-gene-0.27-	microneme MIC2	20	0	61.1						PR00453 (PRINTS); IPR002035 (SMART); IPR000884 (SMART); IPR002035 (G3DSA:3.40.50.GENE3D); IPR002035 (PFAM); G3DSA:2.20.100.10 (GENE3D); IPR000884 (PFAM); G3DSA:2.20.100.10 (GENE3D); PTHR10199 (PANTHER); PTHR10199:SF96 (PANTHER); SIGNAL_PEPTIDE (PHOBIUS); SIGNAL_PEPTIDE_N_REGION (PHOBIUS); SIGNAL_PEPTIDE_C_REGION (PHOBIUS); SIGNAL_PEPTIDE_H_REGION (PHOBIUS); NON_CYTOPLASMIC_DOMAIN (PHOBIUS); IPR00…	no GO terms	no GO terms	NCLIV_033690	hypothetical protein	756	TGME49_201780	microneme protein MIC2 (MIC2)	769	PF3D7_0315200	circumsporozoite- and TRAP-related protein (CTRP)	2114	Fully conserved	+	104	NA	18717	22002	0.5958	2244	0.0002384	0.0001184	TRUE	1.113	2.16295	725.6	1545	509.3	1888	1038	1934	935	1826	588.9	1246	439.2	1327	946.6	1464	725.9
augustus_masked-74-processed-gene-1.32-	SRS domain-containing	20	4.2256e-42	47.95	1	C:GO:0016020	C:membrane			IPR007226 (PFAM); SIGNAL_PEPTIDE_C_REGION (PHOBIUS); NON_CYTOPLASMIC_DOMAIN (PHOBIUS); SIGNAL_PEPTIDE (PHOBIUS); SIGNAL_PEPTIDE_N_REGION (PHOBIUS); SIGNAL_PEPTIDE_H_REGION (PHOBIUS); SignalP-noTM (SIGNALP_EUK); SignalP-TM (SIGNALP_GRAM_POSITIVE); SignalP-noTM (SIGNALP_GRAM_NEGATIVE); IPR007226 (SUPERFAMILY); TMhelix (TMHMM)	C:GO:0016020	C:membrane	NCLIV_052680	SRS domain-containing protein	347	TGME49_259270	SAG-related sequence SRS26E (SRS26E)	490	NA			Partially conserved	-	74	NA	373991	375061	0.5565	1071	0.001167	0.04591	TRUE	1.103	2.14801	74.8	145.4	127.3	226.1	39.83	183.2	121.3	187.5	127.2	245.9	230.1	333	76.12	290.4	197.3
maker-41-augustus-gene-1.29-	tryptophanyl-tRNA synthetase ( 2)	20	0	73.2	5	F:GO:0005524; C:GO:0005737; P:GO:0006436; P:GO:0006568; F:GO:0004830	F:ATP binding; C:cytoplasm; P:tryptophanyl-tRNA aminoacylation; P:tryptophan metabolic process; F:tryptophan-tRNA ligase activity	EC:6.1.1.2; EC:6.1.1	Tryptophan--tRNA ligase; Forming carbon-oxygen bonds	IPR002306 (PRINTS); IPR002306 (TIGRFAM); IPR014729 (G3DSA:3.40.50.GENE3D); IPR002305 (PFAM); G3DSA:1.10.240.10 (GENE3D); PTHR10055 (PANTHER); PTHR10055:SF15 (PANTHER); IPR001412 (PROSITE_PATTERNS); NON_CYTOPLASMIC_DOMAIN (PHOBIUS); SIGNAL_PEPTIDE (PHOBIUS); SIGNAL_PEPTIDE_C_REGION (PHOBIUS); SIGNAL_PEPTIDE_H_REGION (PHOBIUS); SIGNAL_PEPTIDE_N_REGION (PHOBIUS); IPR018163 (SUPERFAMILY); SSF52374 (S…	F:GO:0000166; F:GO:0005524; P:GO:0006418; F:GO:0004812; C:GO:0005737; P:GO:0006436; F:GO:0004830	F:nucleotide binding; F:ATP binding; P:tRNA aminoacylation for protein translation; F:aminoacyl-tRNA ligase activity; C:cytoplasm; P:tryptophanyl-tRNA aminoacylation; F:tryptophan-tRNA ligase activity	NCLIV_040860	tryptophanyl-tRNAsynthetase,related	607	TGME49_288360	tryptophanyl-tRNA synthetase (TrpRS2)	689	PF3D7_1336900	tryptophan--tRNA ligase (WRS)	632	Fully conserved	+	41	NA	264863	270733	0.5691	2295	6.399e-06	0.008473	TRUE	1.092	2.13169	1204	2405	1201	2571	894	2667	1338	2208	955.7	1898	1012	1767	797.3	1973	1015
maker-34-augustus-gene-0.55-	transmembrane	4	2.64785e-12	72.25	1	C:GO:0016021	C:integral component of membrane			Coil (COILS); SIGNAL_PEPTIDE (PHOBIUS); SIGNAL_PEPTIDE_C_REGION (PHOBIUS); NON_CYTOPLASMIC_DOMAIN (PHOBIUS); SIGNAL_PEPTIDE_H_REGION (PHOBIUS); SIGNAL_PEPTIDE_N_REGION (PHOBIUS); SignalP-TM (SIGNALP_GRAM_POSITIVE); SignalP-TM (SIGNALP_EUK); TMhelix (TMHMM)	no GO terms	no GO terms	NCLIV_022900	conserved hypothetical protein	158	TGME49_201860	hypothetical protein	157	NA			Partially conserved	+	34	NA	122322	123490	0.5541	462	0.0001701	0.01165	TRUE	1.089	2.12727	815.3	1354	709.4	2660	528.9	1800	1509	1856	3214	5307	2971	9083	2343	6617	5691
maker-18-augustus-gene-1.41-	2OG-Fe(II) oxygenase family	20	1.85278e-140	69.05	4	F:GO:0031418; F:GO:0005506; F:GO:0016706; P:GO:0055114	F:L-ascorbic acid binding; F:iron ion binding; F:oxidoreductase activity, acting on paired donors, with incorporation or reduction of molecular oxygen, 2-oxoglutarate as one donor, and incorporation of one atom each of oxygen into both donors; P:oxidation-reduction process	EC:1.14.11	Acting on paired donors, with incorporation or reduction of molecular oxygen. The oxygen incorporated need not be derived from O(2)	IPR006620 (SMART); IPR005123 (PFAM); PTHR10869 (PANTHER); IPR005123 (PROSITE_PROFILES)	F:GO:0031418; F:GO:0016705; F:GO:0005506; F:GO:0016491; P:GO:0055114	F:L-ascorbic acid binding; F:oxidoreductase activity, acting on paired donors, with incorporation or reduction of molecular oxygen; F:iron ion binding; F:oxidoreductase activity; P:oxidation-reduction process	NCLIV_004830	hypothetical protein	308	TGME49_221270	oxidoreductase, 2OG-Fe(II) oxygenase family protein	401	PF3D7_0829400	prolyl 4-hydroxylase subunit alpha, putative	441	Fully conserved	-	18	NA	207292	209462	0.5747	1218	0.0001478	0.01048	TRUE	1.086	2.12285	119.7	404.8	163.7	336.5	166	466.2	315.4	499	179	601.8	260.1	435.8	278.9	649.9	451.2
maker-86-augustus-gene-0.75-	microneme MIC11	5	8.78022e-65	71						Coil (COILS); SIGNAL_PEPTIDE (PHOBIUS); NON_CYTOPLASMIC_DOMAIN (PHOBIUS); SIGNAL_PEPTIDE_N_REGION (PHOBIUS); SIGNAL_PEPTIDE_H_REGION (PHOBIUS); SIGNAL_PEPTIDE_C_REGION (PHOBIUS); SignalP-noTM (SIGNALP_EUK); TMhelix (TMHMM)	no GO terms	no GO terms	NCLIV_020720	putative microneme protein MIC11	203	TGME49_204530	microneme protein MIC11 (MIC11)	204	NA			Partially conserved	-	86	NA	119425	120387	0.5143	630	3.15e-06	0.000834	TRUE	1.084	2.11991	1384	2559	1637	3607	1093	3053	2171	4085	4001	7354	5029	9030	3552	8229	6003
maker-31-augustus-gene-2.69-	conserved hypothetical protein	20	0	71.85						no IPS match	no IPS match	no IPS match	NCLIV_059620	conserved hypothetical protein	400	TGME49_216650	S15 sporozoite-expressed protein	436	PF3D7_0814600	conserved Plasmodium protein, unknown function	393	Fully conserved	-	31	NA	612192	614161	0.5461	1203	0.002137	0.0006062	TRUE	1.079	2.11257	336.6	656.4	472.9	846.5	285.5	779.7	457.8	926.3	509.6	988	760.8	1110	485.7	1101	662.9
augustus_masked-38-processed-gene-0.8-	rhoptry kinase family ROP41	20	8.9885e-170	56.45	3	F:GO:0005524; F:GO:0004672; P:GO:0006468	F:ATP binding; F:protein kinase activity; P:protein phosphorylation			IPR000719 (SMART); G3DSA:1.10.510.10 (GENE3D); G3DSA:3.30.200.20 (GENE3D); IPR000719 (PFAM); PTHR24347:SF305 (PANTHER); IPR020636 (PANTHER); IPR017441 (PROSITE_PATTERNS); IPR008271 (PROSITE_PATTERNS); IPR000719 (PROSITE_PROFILES); IPR011009 (SUPERFAMILY)	F:GO:0005524; F:GO:0004672; P:GO:0006468	F:ATP binding; F:protein kinase activity; P:protein phosphorylation	NCLIV_048060	unspecified product	449	TGME49_266100	rhoptry kinase family protein ROP41 (ROP41)	490	PF3D7_1315100	serine/threonine protein kinase (PK9)	367	Fully conserved	+	38	NA	154219	155568	0.5222	1350	0.0001286	0.009637	TRUE	1.075	2.10672	97.24	184.7	127.3	273.4	86.3	211.4	129.4	250.9	131.2	247.8	182.5	319.4	130.8	265.9	167
maker-3-augustus-gene-0.30-	zinc finger (CCCH type) motif-containing	20	4.84913e-38	78.9	1	F:GO:0046872	F:metal ion binding			IPR000571 (SMART); IPR000571 (PFAM); IPR000571 (G3DSA:4.10.1000.GENE3D); PTHR38218 (PANTHER); IPR000571 (PROSITE_PROFILES); IPR000571 (PROSITE_PROFILES); IPR000571 (SUPERFAMILY); IPR000571 (SUPERFAMILY)	F:GO:0046872	F:metal ion binding	NCLIV_055080	putative zinc finger (CCCH type) protein	946	TGME49_311100	zinc finger (CCCH type) motif-containing protein	920	PF3D7_0525000	zinc finger protein, putative	704	Fully conserved	+	3	NA	64818	65875	0.5436	447	0.005565	0.0013	TRUE	1.075	2.10672	231.9	487.4	236.5	362.8	190.3	422.7	166.6	380.2	944.8	1974	1024	1280	871.4	1606	649.3
maker-37-augustus-gene-1.74-	inner membrane complex 22	18	2.08324e-109	59.22						no IPS match	no IPS match	no IPS match	NCLIV_058840	conserved hypothetical protein	242	TGME49_316340	hypothetical protein	243	NA			Partially conserved	+	37	NA	447368	448456	0.5931	720	0.05845	0.005399	TRUE	1.063	2.08927	1070	2484	1182	2513	805.5	2896	2231	3214	2706	6247	3178	5506	2290	6830	5397
augustus_masked-57-processed-gene-0.27-	---NA---									SIGNAL_PEPTIDE_H_REGION (PHOBIUS); SIGNAL_PEPTIDE (PHOBIUS); SIGNAL_PEPTIDE_C_REGION (PHOBIUS); NON_CYTOPLASMIC_DOMAIN (PHOBIUS); SIGNAL_PEPTIDE_N_REGION (PHOBIUS)	no GO terms	no GO terms	NA			NA			NA			Absent	-	57	NA	143623	144606	0.5407	984	0.03785	0.004177	TRUE	1.055	2.07772	157.1	389.1	327.4	478.4	172.6	493.2	292.8	544.4	290.8	716	643.9	766.9	359	851.1	518.4
maker-64-augustus-gene-0.58-	rhoptry ROP6	6	1.87649e-42	51.5						Coil (COILS); TRANSMEMBRANE (PHOBIUS); CYTOPLASMIC_DOMAIN (PHOBIUS); NON_CYTOPLASMIC_DOMAIN (PHOBIUS); TRANSMEMBRANE (PHOBIUS); NON_CYTOPLASMIC_DOMAIN (PHOBIUS); TMhelix (TMHMM)	no GO terms	no GO terms	NCLIV_027850	unspecified product	488	TGME49_258660	rhoptry protein ROP6 (ROP6)	480	NA			Partially conserved	+	64	NA	182455	184498	0.5929	1518	0.01483	0.002372	TRUE	1.055	2.07772	306.7	640.6	309.2	809.7	247.8	763.3	496.6	683.5	368	764.2	394.2	841.3	334.2	853.8	569.9
maker-58-augustus-gene-0.51-	TPA: Translation initiation factor IF-2	20	0	70.15						no IPS match	no IPS match	no IPS match	NCLIV_022540	conserved hypothetical protein	580	TGME49_202390	S15 sporozoite-expressed protein	587	PF3D7_1407700	conserved Plasmodium protein, unknown function	406	Fully conserved	+	58	NA	205747	208397	0.5853	1695	0.0001879	0.01265	TRUE	1.054	2.07628	344.1	695.7	291	825.5	247.8	874.9	679.4	949	369.7	743.2	332.3	768.2	299.3	876.4	698.3
maker-18-augustus-gene-4.75-	rhoptry neck RON3	20	0	68.25						Coil (COILS); TRANSMEMBRANE (PHOBIUS); NON_CYTOPLASMIC_DOMAIN (PHOBIUS); CYTOPLASMIC_DOMAIN (PHOBIUS); TRANSMEMBRANE (PHOBIUS); TRANSMEMBRANE (PHOBIUS); NON_CYTOPLASMIC_DOMAIN (PHOBIUS); CYTOPLASMIC_DOMAIN (PHOBIUS); SignalP-noTM (SIGNALP_EUK); TMhelix (TMHMM); TMhelix (TMHMM); TMhelix (TMHMM)	no GO terms	no GO terms	NCLIV_048590	unspecified product	1937	TGME49_223920	rhoptry neck protein RON3 (RON3)	1958	PF3D7_1252100	rhoptry neck protein 3 (RON3)	2215	Fully conserved	+	18	NA	1110371	1119885	0.5372	5907	0.0001667	9.46e-05	TRUE	1.053	2.07484	1100	2010	1546	2518	982.5	2886	1325	2696	339	616.3	506.5	672.5	340.4	829.8	390.7
augustus_masked-20-processed-gene-2.19-	gliding-associated 80	7	4.57254e-46	77.86						Coil (COILS)	no GO terms	no GO terms	NCLIV_063610	conserved hypothetical protein	382	TGME49_246940	hypothetical protein	393	PF3D7_0315200	circumsporozoite- and TRAP-related protein (CTRP)	2114	Fully conserved	-	20	NA	473068	474162	0.621	1095	0.07075	0.005979	TRUE	1.043	2.06051	164.6	365.5	127.3	320.7	132.8	334.7	239.4	411.1	273.7	604.4	225	462	248.2	519	380.9
maker-39-augustus-gene-4.42-	conserved Plasmodium protein	20	1.17996e-84	66.95						Coil (COILS)	no GO terms	no GO terms	NCLIV_046890	conserved hypothetical protein	363	TGME49_225940	hypothetical protein	315	PF3D7_1006000	conserved Plasmodium protein, unknown function	426	Fully conserved	+	39	NA	881908	883576	0.5614	1092	0.000307	0.01793	TRUE	1.038	2.05338	112.2	192.6	72.76	215.6	126.1	231.3	131	324.3	187.1	319.3	128.9	311.4	236.4	359.7	209
augustus_masked-12-processed-gene-0.17-	kinase domain	20	0	54.05	3	F:GO:0005524; F:GO:0004672; P:GO:0006468	F:ATP binding; F:protein kinase activity; P:protein phosphorylation			IPR000719 (SMART); IPR000719 (PFAM); G3DSA:1.10.510.10 (GENE3D); PTHR24362 (PANTHER); PTHR24362:SF333 (PANTHER); IPR008271 (PROSITE_PATTERNS); IPR000719 (PROSITE_PROFILES); IPR011009 (SUPERFAMILY)	F:GO:0005524; F:GO:0004672; P:GO:0006468	F:ATP binding; F:protein kinase activity; P:protein phosphorylation	NCLIV_004270	putative protein kinase	1118	TGME49_321650	hypothetical protein	1375	PF3D7_0211700	tyrosine kinase-like protein, putative (TKL1)	1233	Fully conserved	-	12	NA	116888	126537	0.5651	3753	0.0007652	0.03454	TRUE	1.012	2.0167	74.8	141.5	72.76	147.2	81.87	155	85.73	201.5	36.3	68.27	37.52	61.87	44.65	70.13	39.8
augustus_masked-91-processed-gene-0.1-	rhoptry kinase family	20	5.41979e-86	56.8	3	F:GO:0005524; F:GO:0004672; P:GO:0006468	F:ATP binding; F:protein kinase activity; P:protein phosphorylation			IPR000719 (SMART); IPR027916 (PFAM); G3DSA:1.10.510.10 (GENE3D); G3DSA:3.30.200.20 (GENE3D); IPR020636 (PANTHER); PTHR24347:SF295 (PANTHER); IPR008271 (PROSITE_PATTERNS); IPR017441 (PROSITE_PATTERNS); IPR000719 (PROSITE_PROFILES); IPR011009 (SUPERFAMILY)	F:GO:0005524; F:GO:0004672; P:GO:0006468	F:ATP binding; F:protein kinase activity; P:protein phosphorylation	NCLIV_060730	unspecified product	549	TGME49_205250	rhoptry protein ROP18 (ROP18)	554	PF3D7_0605300	serine/threonine protein kinase (ARK1)	353	Fully conserved	+	91	NA	5578	7313	0.5691	1736	0.07005	0.005979	TRUE	1.011	2.01531	561	1069	745.8	1667	444.8	1534	1008	1296	588.6	1115	831.3	1514	524.4	1500	1011
maker-89-augustus-gene-0.50-	inner membrane complex 18	5	4.20926e-51	60.8						no IPS match	no IPS match	no IPS match	NCLIV_002380	conserved hypothetical protein	277	TGME49_295360	hypothetical protein	268	PF3D7_1149200	ring-infected erythrocyte surface antigen	1090	Fully conserved	-	89	NA	46338	48195	0.6291	1092	0.0009643	0.03991	TRUE	1.009	2.01252	216.9	398.9	181.9	425.9	110.6	452.1	368.8	535.1	361.8	661.5	322.3	615.1	207.4	703	588.4
augustus_masked-1-processed-gene-4.20-	microneme MIC6	10	2.31531e-19	57.7	2	F:GO:0005515; F:GO:0005509	F:protein binding; F:calcium ion binding			IPR001881 (SMART); IPR000742 (SMART); G3DSA:2.10.25.10 (GENE3D); IPR000152 (PROSITE_PATTERNS); SIGNAL_PEPTIDE_C_REGION (PHOBIUS); SIGNAL_PEPTIDE (PHOBIUS); TRANSMEMBRANE (PHOBIUS); NON_CYTOPLASMIC_DOMAIN (PHOBIUS); SIGNAL_PEPTIDE_N_REGION (PHOBIUS); SIGNAL_PEPTIDE_H_REGION (PHOBIUS); CYTOPLASMIC_DOMAIN (PHOBIUS); IPR000742 (PROSITE_PROFILES); SignalP-TM (SIGNALP_GRAM_POSITIVE); SignalP-noTM (SIGN…	F:GO:0005515; F:GO:0005509	F:protein binding; F:calcium ion binding	NCLIV_061760	putative microneme protein MIC6	327	TGME49_218520	microneme protein MIC6 (MIC6)	349	NA			Partially conserved	-	1	NA	935317	936240	0.5552	924	0.0003547	0.0001565	TRUE	1.005	2.00694	1773	3698	2019	4453	2350	4366	2722	5384	3494	7248	4229	7602	5206	8024	5133
augustus_masked-74-processed-gene-1.36-	SRS domain-containing	7	5.33199e-07	45	1	C:GO:0016020	C:membrane			IPR007226 (G3DSA:2.60.40.GENE3D); IPR007226 (PFAM); SIGNAL_PEPTIDE_H_REGION (PHOBIUS); NON_CYTOPLASMIC_DOMAIN (PHOBIUS); SIGNAL_PEPTIDE_N_REGION (PHOBIUS); SIGNAL_PEPTIDE_C_REGION (PHOBIUS); SIGNAL_PEPTIDE (PHOBIUS); SignalP-noTM (SIGNALP_EUK); SignalP-TM (SIGNALP_GRAM_POSITIVE)	C:GO:0016020	C:membrane	NCLIV_052680	SRS domain-containing protein	347	TGME49_315400	SAG-related sequence SRS53D (SRS53D)	493	NA			Partially conserved	-	74	NA	412359	413362	0.5299	1004	0.0002475	0.01586	TRUE	1.001	2.00139	142.1	204.4	127.3	199.8	86.3	236	116.5	251.5	257.8	368.6	245.4	313.9	175.9	399.2	202.1
maker-39-augustus-gene-3.32-	hypothetical protein HHA_225560	12	8.08909e-122	57.67						Coil (COILS); Coil (COILS)	no GO terms	no GO terms	NCLIV_047150	conserved hypothetical protein	1022	TGME49_225560	hypothetical protein	1116	NA			Partially conserved	+	39	NA	651706	657809	0.5742	3088	0.0002271	0.01478	TRUE	0.9949	1.99294	104.7	265.3	72.76	252.4	135	240.7	163.4	288.8	61.77	155.6	45.6	128.9	89.47	132.4	92.17
maker-64-augustus-gene-0.67-	inner membrane complex 24	7	7.81459e-30	69.86						no IPS match	no IPS match	no IPS match	NCLIV_028050	conserved hypothetical protein	281	TGME49_258470	hypothetical protein	284	PF3D7_0824000	conserved Plasmodium protein, unknown function	807	Fully conserved	-	64	NA	68660	69075	0.5131	267	0.0003007	0.01792	TRUE	0.9921	1.98908	478.7	1043	982.3	1467	356.3	1333	894.5	1420	3266	7077	7119	8666	2731	8477	5837
augustus_masked-39-processed-gene-3.15-	transmembrane	9	2.29161e-84	54.78	1	C:GO:0016021	C:integral component of membrane			TRANSMEMBRANE (PHOBIUS); TRANSMEMBRANE (PHOBIUS); TRANSMEMBRANE (PHOBIUS); CYTOPLASMIC_DOMAIN (PHOBIUS); NON_CYTOPLASMIC_DOMAIN (PHOBIUS); NON_CYTOPLASMIC_DOMAIN (PHOBIUS); CYTOPLASMIC_DOMAIN (PHOBIUS); TRANSMEMBRANE (PHOBIUS); CYTOPLASMIC_DOMAIN (PHOBIUS); TMhelix (TMHMM); TMhelix (TMHMM); TMhelix (TMHMM); TMhelix (TMHMM)	no GO terms	no GO terms	NCLIV_047010	conserved hypothetical protein	499	TGME49_225820	hypothetical protein	510	NA			Partially conserved	+	39	NA	785778	787211	0.5607	1434	0.008303	0.001736	TRUE	0.9826	1.97602	216.9	461.8	309.2	552.1	287.7	537.8	228.1	474.5	275.5	583.1	417.3	607.2	410.6	636.9	277.1
maker-77-augustus-gene-4.38-	major facilitator family	20	0	65.05	2	P:GO:0055085; C:GO:0016021	P:transmembrane transport; C:integral component of membrane			IPR011701 (PFAM); G3DSA:1.20.1250.20 (GENE3D); G3DSA:1.20.1250.20 (GENE3D); PTHR20772 (PANTHER); PTHR20772:SF6 (PANTHER); NON_CYTOPLASMIC_DOMAIN (PHOBIUS); CYTOPLASMIC_DOMAIN (PHOBIUS); NON_CYTOPLASMIC_DOMAIN (PHOBIUS); TRANSMEMBRANE (PHOBIUS); NON_CYTOPLASMIC_DOMAIN (PHOBIUS); CYTOPLASMIC_DOMAIN (PHOBIUS); TRANSMEMBRANE (PHOBIUS); TRANSMEMBRANE (PHOBIUS); TRANSMEMBRANE (PHOBIUS); CYTOPLASMIC_DOM…	P:GO:0055085; C:GO:0016021	P:transmembrane transport; C:integral component of membrane	NCLIV_029570	conserved hypothetical protein	501	TGME49_257530	transporter, major facilitator family protein	504	PF3D7_1129900	transporter, putative	609	Fully conserved	+	77	NA	863412	865130	0.5647	1539	0.0001275	0.009637	TRUE	0.9726	1.96237	1451	1771	909.5	2066	546.6	2225	1013	1584	1717	2083	1144	2118	726.9	2455	1146
maker-20-augustus-gene-0.30-	tubulin-tyrosine ligase family	15	2.60165e-26	82.67	3	P:GO:0006570; F:GO:0004835; P:GO:0006464	P:tyrosine metabolic process; F:tubulin-tyrosine ligase activity; P:cellular protein modification process	EC:6.3.2.25	Tubulin--tyrosine ligase	Coil (COILS); IPR004344 (PFAM); PTHR12241 (PANTHER); PTHR12241:SF136 (PANTHER); IPR004344 (PROSITE_PROFILES); SSF56059 (SUPERFAMILY)	P:GO:0006464	P:cellular protein modification process	NCLIV_019050	putative tubulin-tyrosine ligase family protein	2382	TGME49_244500	Tubulin-tyrosine ligase family protein	2376	PF3D7_1147200	tubulin--tyrosine ligase, putative	2755	Fully conserved	+	20	NA	67917	76418	0.5895	5832	0.0009931	0.04067	TRUE	0.9679	1.95599	127.2	229.9	36.38	142	106.2	211.4	119.7	241	39.71	71.39	12.07	38.39	37.28	61.54	35.76
maker-100-augustus-gene-0.56-	TPA: hypothetical protein BN1204_015380	20	2.90802e-99	51.85						Coil (COILS); NON_CYTOPLASMIC_DOMAIN (PHOBIUS); SIGNAL_PEPTIDE_H_REGION (PHOBIUS); SIGNAL_PEPTIDE_C_REGION (PHOBIUS); SIGNAL_PEPTIDE (PHOBIUS); SIGNAL_PEPTIDE_N_REGION (PHOBIUS); SignalP-noTM (SIGNALP_EUK)	no GO terms	no GO terms	NCLIV_015380	conserved hypothetical protein	338	TGME49_283540	hypothetical protein	376	NA			Partially conserved	-	100	NA	229398	230725	0.5349	1047	0.0001323	0.009674	TRUE	0.9633	1.94976	254.3	711.4	436.6	1078	546.6	962.9	613.1	963	442.4	1230	806.9	1624	1069	1562	1020
maker-35-augustus-gene-0.35-	small heat shock	20	9.46541e-114	75.4						IPR008978 (G3DSA:2.60.40.GENE3D); IPR002068 (PFAM); IPR031107 (PANTHER); PTHR11527:SF208 (PANTHER); IPR002068 (PROSITE_PROFILES); IPR008978 (SUPERFAMILY)	no GO terms	no GO terms	NCLIV_032780	putative small heat shock protein 20	228	TGME49_324600	heat shock protein	192	PF3D7_0816500	small heat shock protein HSP20, putative (HSP20)	172	Fully conserved	+	35	NA	184800	185629	0.5423	579	0.0005548	0.02687	TRUE	0.9531	1.93603	329.1	750.7	509.3	1020	300.9	860.8	765.1	1079	1035	2348	1702	2779	1064	2524	2302
maker-83-augustus-gene-0.18-	rhoptry neck RON5	20	0	67.55						Coil (COILS); Coil (COILS); SIGNAL_PEPTIDE_H_REGION (PHOBIUS); CYTOPLASMIC_DOMAIN (PHOBIUS); SIGNAL_PEPTIDE (PHOBIUS); NON_CYTOPLASMIC_DOMAIN (PHOBIUS); TRANSMEMBRANE (PHOBIUS); SIGNAL_PEPTIDE_N_REGION (PHOBIUS); TRANSMEMBRANE (PHOBIUS); NON_CYTOPLASMIC_DOMAIN (PHOBIUS); SIGNAL_PEPTIDE_C_REGION (PHOBIUS); SignalP-TM (SIGNALP_EUK); TMhelix (TMHMM); TMhelix (TMHMM)	no GO terms	no GO terms	NCLIV_055360	unspecified product	1640	TGME49_311470	rhoptry neck protein RON5 (RON5)	1702	PF3D7_0817700	rhoptry neck protein 5 (RON5)	1156		-	83	NA	5611	20856	0.5669	5931	0.001767	0.0005398	TRUE	0.9527	1.93549	508.6	890.2	382	788.6	402.7	934.7	525.7	952.5	156.2	271.8	124.6	209.7	139	267.6	154.4
maker-31-augustus-gene-1.32-	microtubule associated SPM2	20	1.0163e-99	59.75						Coil (COILS)	no GO terms	no GO terms	NCLIV_014050	conserved hypothetical protein	303	TGME49_286590	microtubule associated protein SPM2 (SPM2)	357	PF3D7_1230300	subpellicular microtubule protein 2, putative (SPM2)	258	Fully conserved	+	31	NA	306995	308859	0.5612	1479	0.0003324	0.0186	TRUE	0.9473	1.92826	231.9	471.6	200.1	494.2	205.8	506.1	412.5	641	285.6	577.4	261.8	527.1	284.8	581.1	485.9
augustus_masked-63-processed-gene-0.28-	rhoptry kinase family ROP37 (incomplete catalytic triad)	20	1.70425e-103	47.5	3	F:GO:0005524; F:GO:0004672; P:GO:0006468	F:ATP binding; F:protein kinase activity; P:protein phosphorylation			IPR000719 (SMART); G3DSA:1.10.510.10 (GENE3D); IPR000719 (PFAM); PTHR24343 (PANTHER); PTHR24343:SF270 (PANTHER); IPR017441 (PROSITE_PATTERNS); IPR008271 (PROSITE_PATTERNS); IPR000719 (PROSITE_PROFILES); IPR011009 (SUPERFAMILY)	F:GO:0005524; F:GO:0004672; P:GO:0006468	F:ATP binding; F:protein kinase activity; P:protein phosphorylation	NCLIV_031550	unspecified product	425	TGME49_294560	rhoptry kinase family protein ROP37 (incomplete catalytic triad) (ROP37)	776	PF3D7_1431500	mitogen-activated protein kinase 1 (MAPK1)	914	Fully conserved	-	63	NA	98547	100353	0.5434	1807	0.0009646	0.03991	TRUE	0.9429	1.92239	104.7	180.8	200.1	278.7	95.15	245.4	114.9	198.5	105.6	181.2	214.3	243.2	107.8	230.6	110.7
augustus_masked-24-processed-gene-1.27-	rhoptry ROP17	20	7.81605e-106	54.45	3	F:GO:0005524; F:GO:0004672; P:GO:0006468	F:ATP binding; F:protein kinase activity; P:protein phosphorylation			IPR000719 (SMART); G3DSA:3.30.200.20 (GENE3D); IPR027916 (PFAM); G3DSA:1.10.510.10 (GENE3D); IPR020636 (PANTHER); IPR008271 (PROSITE_PATTERNS); IPR000719 (PROSITE_PROFILES); IPR011009 (SUPERFAMILY)	F:GO:0005524; F:GO:0004672; P:GO:0006468	F:ATP binding; F:protein kinase activity; P:protein phosphorylation	NCLIV_027710	unspecified product	349	TGME49_258800	rhoptry kinase family protein ROP31 (ROP31)	531	PF3D7_1436600	cGMP-dependent protein kinase (PKG)	853	Fully conserved	1716	24	NA	383756	385471	0.5286	1716	0.0009238	0.03946	TRUE	0.9366	1.91401	112.2	204.4	254.7	257.6	115.1	322.9	155.3	320.8	119.1	215.7	287.2	236.8	137.3	319.6	157.7
maker-92-augustus-gene-1.39-	rhoptry metalloprotease toxolysin TLN1	20	0	71.65	3	F:GO:0046872; P:GO:0008152; F:GO:0008233	F:metal ion binding; P:metabolic process; F:peptidase activity			IPR032632 (PFAM); IPR011237 (G3DSA:3.30.830.GENE3D); IPR011765 (PFAM); IPR011237 (G3DSA:3.30.830.GENE3D); IPR011237 (G3DSA:3.30.830.GENE3D); IPR011237 (G3DSA:3.30.830.GENE3D); IPR007863 (PFAM); PTHR43690 (PANTHER); PTHR43690:SF4 (PANTHER); SIGNAL_PEPTIDE_C_REGION (PHOBIUS); SIGNAL_PEPTIDE_N_REGION (PHOBIUS); SIGNAL_PEPTIDE (PHOBIUS); NON_CYTOPLASMIC_DOMAIN (PHOBIUS); SIGNAL_PEPTIDE_H_REGION (PHOB…	F:GO:0046872; F:GO:0003824	F:metal ion binding; F:catalytic activity	NCLIV_036700	putative M16 family peptidase	1408	TGME49_269885	rhoptry metalloprotease toxolysin TLN1 (TLN1)	1645	PF3D7_1121800	petidase, M16 family	2024	Fully conserved	+	92	NA	368729	376543	0.5553	4500	0.0001055	0.00845	TRUE	0.9363	1.91361	202	422.5	163.7	315.5	174.8	388.7	254	434.9	81.74	170	70.4	110.6	79.51	146.7	98.32
maker-29-augustus-gene-0.63-	G2	20	2.99936e-158	75.35						Coil (COILS); Coil (COILS)	no GO terms	no GO terms	NCLIV_056670	conserved hypothetical protein	274	TGME49_313380	hypothetical protein	274	PF3D7_0929600	G2 protein, putative	272	Fully conserved	-	29	NA	211382	212883	0.5648	825	0.0006637	0.03102	TRUE	0.9353	1.91229	426.4	872.5	491.1	1157	307.6	839.6	839.5	1127	941.3	1915	1152	2211	763.1	1728	1773
augustus_masked-95-processed-gene-2.52-	rhoptry kinase family ROP32	20	0	55.05	3	F:GO:0005524; F:GO:0004672; P:GO:0006468	F:ATP binding; F:protein kinase activity; P:protein phosphorylation			IPR000719 (SMART); G3DSA:3.30.200.20 (GENE3D); G3DSA:1.10.510.10 (GENE3D); IPR027916 (PFAM); IPR020636 (PANTHER); PTHR24347:SF295 (PANTHER); IPR008271 (PROSITE_PATTERNS); IPR017441 (PROSITE_PATTERNS); SIGNAL_PEPTIDE (PHOBIUS); SIGNAL_PEPTIDE_N_REGION (PHOBIUS); SIGNAL_PEPTIDE_H_REGION (PHOBIUS); SIGNAL_PEPTIDE_C_REGION (PHOBIUS); NON_CYTOPLASMIC_DOMAIN (PHOBIUS); IPR000719 (PROSITE_PROFILES); IPR…	F:GO:0005524; F:GO:0004672; P:GO:0006468	F:ATP binding; F:protein kinase activity; P:protein phosphorylation	NCLIV_035860	unspecified product	584	TGME49_270920	rhoptry kinase family protein ROP32 (ROP32)	632	PF3D7_0217500	calcium-dependent protein kinase 1 (CDPK1)	524	Fully conserved	-	95	NA	738405	740156	0.5582	1752	0.0004921	0.02506	TRUE	0.9276	1.90211	157.1	210.3	90.95	205	121.7	259.5	105.1	227.1	163.3	217.3	100.5	184.6	142.2	251.5	104.6
augustus_masked-9-processed-gene-0.20-	RNA helicase-1	7	4.22304e-55	56.86	2	P:GO:0008152; F:GO:0004386	P:metabolic process; F:helicase activity			no IPS match	no IPS match	no IPS match	NCLIV_043630	putative RNA helicase-1	397	TGME49_210370	hypothetical protein	479	NA			Partially conserved	-	9	NA	80223	81239	0.5369	1017	0.0009512	0.03991	TRUE	0.9275	1.90198	284.2	473.6	454.8	678.2	159.3	600.1	415.7	653.3	509.1	843.2	865.3	1052	320.7	1002	712.1
maker-52-augustus-gene-0.20-	rhoptry neck RON4	20	0	63.7	3	C:GO:0016020; C:GO:0005576; C:GO:0020005	C:membrane; C:extracellular region; C:symbiont-containing vacuole membrane			SIGNAL_PEPTIDE_C_REGION (PHOBIUS); NON_CYTOPLASMIC_DOMAIN (PHOBIUS); SIGNAL_PEPTIDE_H_REGION (PHOBIUS); SIGNAL_PEPTIDE (PHOBIUS); SIGNAL_PEPTIDE_N_REGION (PHOBIUS); SignalP-TM (SIGNALP_GRAM_POSITIVE); SignalP-noTM (SIGNALP_GRAM_NEGATIVE); SignalP-noTM (SIGNALP_EUK); TMhelix (TMHMM)	no GO terms	no GO terms	NCLIV_030050	unspecified product	890	TGME49_229010	rhoptry neck protein RON4 (RON4)	984	PF3D7_1116000	rhoptry neck protein 4 (RON4)	1201	Fully conserved	+	52	NA	105745	114228	0.5621	3279	0.0003165	0.01815	TRUE	0.9189	1.89067	112.2	241.7	109.1	241.9	130.6	268.9	156.9	257.9	62.32	133.5	64.41	116.3	81.5	139.3	83.36
augustus_masked-5-processed-gene-1.3-	leucine rich repeat-containing	9	7.101e-91	67.78	1	F:GO:0005515	F:protein binding			IPR032675 (G3DSA:3.80.10.GENE3D); PTHR11375 (PANTHER); PTHR11375:SF13 (PANTHER); IPR001611 (PROSITE_PROFILES); IPR001611 (PROSITE_PROFILES); IPR032675 (SUPERFAMILY)	F:GO:0005515	F:protein binding	NA			TGME49_304670	leucine rich repeat-containing protein	338	PF3D7_1427900	conserved protein, unknown function	281	Partially conserved	+	5	NA	233715	236340	0.5398	804	0.0005651	0.02704	TRUE	0.9184	1.89002	172	359.6	382	394.3	139.4	372.3	224.9	446.6	389.7	809.9	919.4	773.6	354.9	786.2	487.2
augustus_masked-99-processed-gene-0.23-	SRS domain-containing	20	1.07451e-64	54	1	C:GO:0016020	C:membrane			IPR028352 (PRINTS); IPR007226 (G3DSA:2.60.40.GENE3D); IPR007226 (PFAM); TRANSMEMBRANE (PHOBIUS); NON_CYTOPLASMIC_DOMAIN (PHOBIUS); CYTOPLASMIC_DOMAIN (PHOBIUS); CYTOPLASMIC_DOMAIN (PHOBIUS); TRANSMEMBRANE (PHOBIUS); IPR007226 (SUPERFAMILY); IPR007226 (SUPERFAMILY)	C:GO:0016020	C:membrane	NCLIV_034380	SRS domain-containing protein	379	TGME49_267140	SAG-related sequence SRS38B (SRS38B)	390	NA			Partially conserved	-	99	NA	149319	150452	0.5485	1134	0.001009	0.04091	TRUE	0.9054	1.87306	119.7	269.2	200.1	331.2	108.4	244.3	205.4	323.7	192.2	429.9	341.4	460.7	195.7	365.8	315.6
maker-95-augustus-gene-2.58-	p25-alpha family	20	1.96293e-71	76.45						IPR008907 (PFAM); IPR011992 (G3DSA:1.10.238.GENE3D); IPR008907 (PANTHER); PTHR12932:SF21 (PANTHER); IPR011992 (SUPERFAMILY)	no GO terms	no GO terms	NCLIV_036160	hypothetical protein	153	TGME49_320560	p25-alpha family protein	144	PF3D7_1236600	p25-alpha family protein, putative	152	Fully conserved	+	95	NA	491157	491933	0.5342	483	0.0004665	0.02406	TRUE	0.9053	1.87293	179.5	332.1	218.3	457.4	181.5	412.2	310.6	504.2	677	1245	874.5	1494	768.9	1449	1120
augustus_masked-91-processed-gene-0.2-	rhoptry kinase family	20	2.39576e-89	53.7	3	F:GO:0005524; F:GO:0004672; P:GO:0006468	F:ATP binding; F:protein kinase activity; P:protein phosphorylation			IPR000719 (SMART); G3DSA:1.10.510.10 (GENE3D); G3DSA:3.30.200.20 (GENE3D); IPR027916 (PFAM); PTHR24347:SF295 (PANTHER); IPR020636 (PANTHER); IPR017441 (PROSITE_PATTERNS); IPR008271 (PROSITE_PATTERNS); SIGNAL_PEPTIDE_H_REGION (PHOBIUS); SIGNAL_PEPTIDE (PHOBIUS); SIGNAL_PEPTIDE_N_REGION (PHOBIUS); NON_CYTOPLASMIC_DOMAIN (PHOBIUS); SIGNAL_PEPTIDE_C_REGION (PHOBIUS); IPR000719 (PROSITE_PROFILES); IPR…	F:GO:0005524; F:GO:0004672; P:GO:0006468	F:ATP binding; F:protein kinase activity; P:protein phosphorylation	NCLIV_060730	unspecified product	549	TGME49_205250	rhoptry protein ROP18 (ROP18)	554	PF3D7_1431500	mitogen-activated protein kinase 1 (MAPK1)	914	Fully conserved	+	91	NA	19093	20832	0.5684	1740	0.0001118	0.008705	TRUE	0.901	1.86736	1541	2620	1801	4001	1279	3731	2604	3162	1613	2726	2003	3627	1505	3641	2607
augustus_masked-16-processed-gene-0.22-	rhoptry neck RON8	20	0	59.7						Coil (COILS); SIGNAL_PEPTIDE_H_REGION (PHOBIUS); SIGNAL_PEPTIDE_N_REGION (PHOBIUS); SIGNAL_PEPTIDE (PHOBIUS); NON_CYTOPLASMIC_DOMAIN (PHOBIUS); SIGNAL_PEPTIDE_C_REGION (PHOBIUS); SignalP-TM (SIGNALP_GRAM_POSITIVE)	no GO terms	no GO terms	NCLIV_070010	hypothetical protein, conserved	2995	TGME49_306060	rhoptry neck protein RON8 (RON8)	2980	PF3D7_0202000	knob-associated histidine-rich protein (KAHRP)	654	Fully conserved	-	16	NA	146021	165737	0.5848	9258	0.02314	0.002872	TRUE	0.8914	1.85498	800.4	1248	673	1130	544.4	1483	878.4	1509	157.5	244.1	140.7	192.6	120.4	272	165.3
maker-24-augustus-gene-1.38-	rhoptry neck RON10	20	0	64.8						TRANSMEMBRANE (PHOBIUS); NON_CYTOPLASMIC_DOMAIN (PHOBIUS); CYTOPLASMIC_DOMAIN (PHOBIUS); TMhelix (TMHMM)	no GO terms	no GO terms	NCLIV_025730	conserved hypothetical protein	770	TGME49_261750	rhoptry neck protein RON10 (RON10)	835	NA			Partially conserved	-	24	NA	220651	225297	0.5724	2706	0.0004464	0.02336	TRUE	0.8811	1.84178	134.6	271.2	200.1	289.2	128.3	317.1	197.4	312.7	90.62	181.5	143.1	168.6	97.08	199	127.1
maker-11-augustus-gene-1.40-	conserved hypothetical protein	6	7.17587e-33	75.17						no IPS match	no IPS match	no IPS match	NCLIV_050060	conserved hypothetical protein	233	TGME49_235690	hypothetical protein	238	NA			Partially conserved	-	11	NA	349580	350583	0.6023	709	0.0006562	0.03102	TRUE	0.8746	1.8335	396.4	581.7	181.9	699.3	232.3	551.9	461	611.3	1018	1486	496.5	1556	670.8	1322	1133
augustus_masked-95-processed-gene-0.5-	transmembrane	17	0	58.76	1	C:GO:0016021	C:integral component of membrane			Coil (COILS); Coil (COILS); Coil (COILS); Coil (COILS); Coil (COILS); SIGNAL_PEPTIDE (PHOBIUS); SIGNAL_PEPTIDE_N_REGION (PHOBIUS); SIGNAL_PEPTIDE_C_REGION (PHOBIUS); NON_CYTOPLASMIC_DOMAIN (PHOBIUS); SIGNAL_PEPTIDE_H_REGION (PHOBIUS); SignalP-noTM (SIGNALP_EUK); SignalP-noTM (SIGNALP_GRAM_NEGATIVE); SignalP-TM (SIGNALP_GRAM_POSITIVE)	no GO terms	no GO terms	NCLIV_036830	conserved hypothetical protein	909	TGME49_269690	hypothetical protein	865	NA			Partially conserved	+	95	NA	63635	66226	0.5444	2592	0.02238	0.002872	TRUE	0.8726	1.83096	605.9	1124	654.9	1188	894	1407	648.7	1469	425.7	785.3	488.9	723.1	706	921.6	436
augustus_masked-23-processed-gene-2.4-	---NA---									NON_CYTOPLASMIC_DOMAIN (PHOBIUS); TRANSMEMBRANE (PHOBIUS); CYTOPLASMIC_DOMAIN (PHOBIUS); TMhelix (TMHMM)	no GO terms	no GO terms	NCLIV_051340	putative toxofilin	291	TGME49_214080	toxofilin	243	NA			Partially conserved	+	23	NA	467159	468340	0.599	1182	0.0004452	0.02336	TRUE	0.8699	1.82754	1436	2386	1710	3360	955.9	2871	2392	3232	2213	3655	2799	4483	1655	4125	3526
maker-35-augustus-gene-1.42-	thioredoxin	20	1.18152e-137	78.8	3	F:GO:0047134; P:GO:0055114; C:GO:0005875	F:protein-disulfide reductase activity; P:oxidation-reduction process; C:microtubule associated complex	EC:1.8.1.8	Protein-disulfide reductase	IPR012336 (PFAM); IPR012336 (G3DSA:3.40.30.GENE3D); PTHR13871:SF58 (PANTHER); PTHR13871 (PANTHER); IPR012336 (SUPERFAMILY)	no GO terms	no GO terms	NCLIV_032390	conserved hypothetical protein	225	TGME49_232410	PDI family protein	220	PF3D7_0919300	thioredoxin-like protein 1, putative (TrxL1)	207	Fully conserved	+	35	NA	386680	388275	0.5991	666	0.0005033	0.02531	TRUE	0.8571	1.81139	501.2	1063	800.4	1399	469.1	1078	965.7	1396	1371	2891	2326	3312	1442	2749	2526
augustus_masked-14-processed-gene-0.13-	Tsp1 domain-containing TSP12 (Precursor) related	20	0	65.55						IPR000884 (SMART); NON_CYTOPLASMIC_DOMAIN (PHOBIUS); CYTOPLASMIC_DOMAIN (PHOBIUS); TRANSMEMBRANE (PHOBIUS); IPR000884 (PROSITE_PROFILES)	no GO terms	no GO terms	NCLIV_038360	tsp1 domain-containing protein TSP12 (Precursor),related	1335	TGME49_279420	hypothetical protein	1329	NA			Partially conserved	-	14	NA	23994	27995	0.539	4002	0.001305	0.04938	TRUE	0.8467	1.79838	149.6	216.2	181.9	205	123.9	285.4	137.5	289.4	68.08	97.81	87.96	80.82	63.38	121.1	59.85
maker-19-augustus-gene-0.31-	GPI-anchored micronemal	20	1.33422e-143	60.85	2	F:GO:0005509; C:GO:0005576	F:calcium ion binding; C:extracellular region			NON_CYTOPLASMIC_DOMAIN (PHOBIUS); SIGNAL_PEPTIDE_H_REGION (PHOBIUS); SIGNAL_PEPTIDE_N_REGION (PHOBIUS); TRANSMEMBRANE (PHOBIUS); SIGNAL_PEPTIDE_C_REGION (PHOBIUS); CYTOPLASMIC_DOMAIN (PHOBIUS); SIGNAL_PEPTIDE (PHOBIUS); SignalP-noTM (SIGNALP_EUK); TMhelix (TMHMM)	no GO terms	no GO terms	NCLIV_018530	conserved hypothetical protein	955	TGME49_243930	hypothetical protein	943	PF3D7_0828800	GPI-anchored micronemal antigen (GAMA)	738	Fully conserved	+	19	NA	92463	96383	0.6166	2856	0.0007979	0.03561	TRUE	0.8369	1.78621	149.6	430.4	181.9	399.6	323.1	441.5	254	453	95.4	272.9	123.2	220.7	231.5	262.5	154.9
augustus_masked-74-processed-gene-1.40-	SRS domain-containing	11	1.77095e-07	50.09	1	C:GO:0016020	C:membrane			IPR007226 (PFAM); IPR007226 (G3DSA:2.60.40.GENE3D); CYTOPLASMIC_DOMAIN (PHOBIUS); NON_CYTOPLASMIC_DOMAIN (PHOBIUS); TRANSMEMBRANE (PHOBIUS); IPR007226 (SUPERFAMILY)	C:GO:0016020	C:membrane	NCLIV_052640	SRS domain-containing protein	343	TGME49_315390	SAG-related sequence SRS53C (SRS53C)	317	NA			Partially conserved	-	74	NA	463817	464929	0.5211	1113	0.0005098	0.02531	TRUE	0.8236	1.76982	837.8	1047	1019	1551	522.2	1429	933.4	1722	1371	1704	1771	2198	960.4	2180	1461
maker-24-augustus-gene-3.71-	conserved hypothetical protein	20	9.08216e-108	67.1						Coil (COILS)	no GO terms	no GO terms	NCLIV_027160	conserved hypothetical protein	250	TGME49_259630	hypothetical protein	160	PF3D7_0518900	conserved Plasmodium protein, unknown function	194	Fully conserved	-	24	NA	756403	758043	0.5443	948	0.000447	0.02336	TRUE	0.8221	1.76798	920	1444	1201	2082	639.5	1805	1335	1847	1768	2759	2451	3464	1381	3233	2452
maker-39-augustus-gene-4.47-	major facilitator family	20	0	68.6	1	C:GO:0016021	C:integral component of membrane			G3DSA:1.20.1250.20 (GENE3D); PF13347 (PFAM); PTHR11328 (PANTHER); TRANSMEMBRANE (PHOBIUS); NON_CYTOPLASMIC_DOMAIN (PHOBIUS); CYTOPLASMIC_DOMAIN (PHOBIUS); CYTOPLASMIC_DOMAIN (PHOBIUS); CYTOPLASMIC_DOMAIN (PHOBIUS); TRANSMEMBRANE (PHOBIUS); CYTOPLASMIC_DOMAIN (PHOBIUS); TRANSMEMBRANE (PHOBIUS); CYTOPLASMIC_DOMAIN (PHOBIUS); TRANSMEMBRANE (PHOBIUS); TRANSMEMBRANE (PHOBIUS); NON_CYTOPLASMIC_DOMAIN (…	no GO terms	no GO terms	NCLIV_046810	putative transmembrane domain-containing protein	589	TGME49_226020	transporter, major facilitator family protein	589	PF3D7_0529200	sugar transporter, putative	548	Fully conserved	+	39	NA	937397	940958	0.5429	1770	0.0005441	0.02668	TRUE	0.8213	1.767	261.8	402.9	163.7	489	232.3	455.6	336.5	511.8	269.4	412.1	179	435.7	268.7	437.1	331.2
augustus_masked-1-processed-gene-8.17-	SAG-related sequence SRS23	20	3.06592e-24	42.8	1	C:GO:0016020	C:membrane			IPR007226 (PFAM); SIGNAL_PEPTIDE_N_REGION (PHOBIUS); SIGNAL_PEPTIDE_C_REGION (PHOBIUS); NON_CYTOPLASMIC_DOMAIN (PHOBIUS); SIGNAL_PEPTIDE_H_REGION (PHOBIUS); SIGNAL_PEPTIDE (PHOBIUS); SignalP-noTM (SIGNALP_EUK); SignalP-TM (SIGNALP_GRAM_POSITIVE); IPR007226 (SUPERFAMILY)	C:GO:0016020	C:membrane	NCLIV_043601	SRS domain-containing protein	342	TGME49_210330	SAG-related sequence SRS37B (SRS37B)	347	NA			Partially conserved	-	1	NA	1620771	1621751	0.5403	981	0.0002933	0.01792	TRUE	0.8147	1.75893	1077	1582	1328	1893	717	1846	1309	2362	2000	2920	2619	3043	1496	3195	2324
augustus_masked-40-processed-gene-0.12-	SAG-related sequence SRS23	20	7.61766e-27	39.7	1	C:GO:0016020	C:membrane			IPR007226 (PFAM); IPR007226 (G3DSA:2.60.40.GENE3D); NON_CYTOPLASMIC_DOMAIN (PHOBIUS); SIGNAL_PEPTIDE (PHOBIUS); SIGNAL_PEPTIDE_C_REGION (PHOBIUS); SIGNAL_PEPTIDE_N_REGION (PHOBIUS); SIGNAL_PEPTIDE_H_REGION (PHOBIUS); SignalP-TM (SIGNALP_GRAM_POSITIVE); SignalP-noTM (SIGNALP_EUK); IPR007226 (SUPERFAMILY); IPR007226 (SUPERFAMILY)	C:GO:0016020	C:membrane	NCLIV_043601	SRS domain-containing protein	342	TGME49_210320	SAG-related sequence SRS37A (SRS37A)	349	NA			Partially conserved	-	40	NA	53489	54598	0.5604	1110	0.0008834	0.03814	TRUE	0.8143	1.75844	179.5	332.1	291	394.3	161.5	351.1	252.3	418.6	294.6	541.8	507.4	560.3	297.9	537.1	396
maker-57-augustus-gene-0.46-	rhoptry neck RON6	20	3.15163e-159	68.45						Coil (COILS); SIGNAL_PEPTIDE_C_REGION (PHOBIUS); SIGNAL_PEPTIDE_H_REGION (PHOBIUS); SIGNAL_PEPTIDE (PHOBIUS); NON_CYTOPLASMIC_DOMAIN (PHOBIUS); SIGNAL_PEPTIDE_N_REGION (PHOBIUS); TMhelix (TMHMM)	no GO terms	no GO terms	NCLIV_006850	unspecified product	2418	TGME49_297960	rhoptry neck protein RON6 (RON6)	2265	PF3D7_0214900	rhoptry neck protein 6 (RON6)	950	Fully conserved	+	57	NA	147263	154968	0.5873	3492	0.0007477	0.03453	TRUE	0.7994	1.74038	246.8	406.8	291	336.5	223.5	455.6	276.6	555.4	128.7	210.9	161.3	152	131	221.6	138
augustus_masked-99-processed-gene-0.21-	SRS domain-containing	20	8.1664e-64	55.75	1	C:GO:0016020	C:membrane			IPR028352 (PRINTS); IPR007226 (PFAM); IPR007226 (G3DSA:2.60.40.GENE3D); NON_CYTOPLASMIC_DOMAIN (PHOBIUS); TRANSMEMBRANE (PHOBIUS); CYTOPLASMIC_DOMAIN (PHOBIUS); IPR007226 (SUPERFAMILY); IPR007226 (SUPERFAMILY); TMhelix (TMHMM)	C:GO:0016020	C:membrane	NCLIV_038920	SRS domain-containing protein	386	TGME49_273130	SAG-related sequence SRS30A (SRS30A)	362	NA			Partially conserved	-	99	NA	143323	144462	0.5632	1140	0.001234	0.04756	TRUE	0.7942	1.73412	157.1	369.4	345.6	425.9	234.6	375.8	270.1	519.3	251	586.8	586.7	589.2	421.1	559.7	412.8
maker-80-augustus-gene-0.32-	conserved hypothetical protein	14	3.61846e-72	71.79						SIGNAL_PEPTIDE_N_REGION (PHOBIUS); NON_CYTOPLASMIC_DOMAIN (PHOBIUS); SIGNAL_PEPTIDE (PHOBIUS); SIGNAL_PEPTIDE_C_REGION (PHOBIUS); SIGNAL_PEPTIDE_H_REGION (PHOBIUS); SignalP-noTM (SIGNALP_EUK)	no GO terms	no GO terms	NCLIV_034800	conserved hypothetical protein	406	TGME49_272520	hypothetical protein	401	PF3D7_0619000.1	conserved Plasmodium protein, unknown function	1796	Fully conserved	+	80	NA	40777	42116	0.548	1188	0.001047	0.042	TRUE	0.7849	1.72297	486.2	589.5	400.2	767.6	261.1	651.7	488.5	790.7	745.4	898.6	651.9	1019	449.9	931.6	716.4
augustus_masked-15-processed-gene-2.24-	microneme MIC1	20	1.33194e-84	56.95	1	F:GO:0005515	F:protein binding			IPR008117 (PRINTS); IPR019562 (PFAM); IPR024691 (PFAM); SIGNAL_PEPTIDE_H_REGION (PHOBIUS); SIGNAL_PEPTIDE (PHOBIUS); SIGNAL_PEPTIDE_C_REGION (PHOBIUS); SIGNAL_PEPTIDE_N_REGION (PHOBIUS); NON_CYTOPLASMIC_DOMAIN (PHOBIUS); SignalP-noTM (SIGNALP_EUK)	no GO terms	no GO terms	NCLIV_043270	putative microneme protein MIC1	460	TGME49_291890	microneme protein MIC1 (MIC1)	456	NA			Partially conserved	-	15	NA	560397	564600	0.5411	2031	0.000134	0.009674	TRUE	0.7119	1.63796	4638	7538	5330	8870	5837	9145	6530	11070	4159	6721	5078	6888	5883	7646	5601
augustus_masked-2-processed-gene-6.14-	microneme MIC10	9	5.05869e-27	66.44						Coil (COILS); Coil (COILS); NON_CYTOPLASMIC_DOMAIN (PHOBIUS); SIGNAL_PEPTIDE_N_REGION (PHOBIUS); SIGNAL_PEPTIDE_H_REGION (PHOBIUS); SIGNAL_PEPTIDE (PHOBIUS); SIGNAL_PEPTIDE_C_REGION (PHOBIUS); SignalP-TM (SIGNALP_GRAM_POSITIVE); TMhelix (TMHMM)	no GO terms	no GO terms	NCLIV_066250	unspecified product	198	TGME49_250710	microneme protein MIC10 (MIC10)	198	NA			Partially conserved	+	2	NA	1368666	1369256	0.5635	591	0.0002962	0.01792	TRUE	0.7092	1.6349	2618	3911	2219	4863	3344	4890	3407	5449	8068	11980	7266	12980	11580	14050	10040
maker-36-augustus-gene-3.26-	D-3-phosphoglycerate dehydrogenase	20	0	66.4	6	F:GO:0051287; F:GO:0004617; P:GO:0006564; P:GO:0055114; P:GO:0006544; P:GO:0006566	F:NAD binding; F:phosphoglycerate dehydrogenase activity; P:L-serine biosynthetic process; P:oxidation-reduction process; P:glycine metabolic process; P:threonine metabolic process	EC:1.1.1.95	Phosphoglycerate dehydrogenase	G3DSA:3.30.70.260 (GENE3D); IPR029009 (G3DSA:3.30.1330.GENE3D); IPR016040 (G3DSA:3.40.50.GENE3D); IPR006139 (PFAM); IPR006236 (TIGRFAM); IPR006140 (PFAM); IPR016040 (G3DSA:3.40.50.GENE3D); PTHR42938 (PANTHER); PTHR42938:SF9 (PANTHER); IPR029753 (PROSITE_PATTERNS); IPR029753 (PROSITE_PATTERNS); SSF55021 (SUPERFAMILY); IPR029009 (SUPERFAMILY); SSF52283 (SUPERFAMILY); IPR016040 (SUPERFAMILY)	F:GO:0016616; F:GO:0051287; P:GO:0008152; F:GO:0004617; P:GO:0006564; P:GO:0055114	F:oxidoreductase activity, acting on the CH-OH group of donors, NAD or NADP as acceptor; F:NAD binding; P:metabolic process; F:phosphoglycerate dehydrogenase activity; P:L-serine biosynthetic process; P:oxidation-reduction process	NCLIV_016450	hypothetical protein	398	TGME49_239820	D-3-phosphoglycerate dehydrogenase	604	NA			Partially conserved	+	36	NA	664327	672703	0.5338	1821	0.001159	0.04591	TRUE	0.6609	1.58107	860.2	1258	1292	1535	778.9	1380	884.8	1687	860.4	1251	1372	1330	875.5	1287	846.5
maker-20-augustus-gene-0.33-	nucleoside transporter	20	8.70458e-170	55.05	3	F:GO:0005337; C:GO:0016021; P:GO:0015858	F:nucleoside transmembrane transporter activity; C:integral component of membrane; P:nucleoside transport			IPR002259 (PFAM); IPR002259 (PANTHER); NON_CYTOPLASMIC_DOMAIN (PHOBIUS); NON_CYTOPLASMIC_DOMAIN (PHOBIUS); NON_CYTOPLASMIC_DOMAIN (PHOBIUS); TRANSMEMBRANE (PHOBIUS); NON_CYTOPLASMIC_DOMAIN (PHOBIUS); CYTOPLASMIC_DOMAIN (PHOBIUS); TRANSMEMBRANE (PHOBIUS); NON_CYTOPLASMIC_DOMAIN (PHOBIUS); TRANSMEMBRANE (PHOBIUS); NON_CYTOPLASMIC_DOMAIN (PHOBIUS); CYTOPLASMIC_DOMAIN (PHOBIUS); CYTOPLASMIC_DOMAIN (P…	F:GO:0005337; C:GO:0016021; P:GO:0006810	F:nucleoside transmembrane transporter activity; C:integral component of membrane; P:transport	NCLIV_019000	putative adenosine transporter	465	TGME49_244440	nucleoside transporter protein	462	PF3D7_1347200	nucleoside transporter 1 (NT1)	422	Fully conserved	+	20	NA	108417	110785	0.6092	2221	0.0004273	0.02325	TRUE	-0.8931	-1.85716	381.5	259.4	291	126.2	407.2	165.6	339.7	213.1	312.8	211.5	253.6	89.61	375.2	126.6	266.5
maker-10-augustus-gene-1.53-	chaperonin mitochondrial precursor	20	0	88.25	3	F:GO:0005524; C:GO:0005737; P:GO:0042026	F:ATP binding; C:cytoplasm; P:protein refolding			IPR001844 (PRINTS); IPR027413 (G3DSA:1.10.560.GENE3D); IPR002423 (PFAM); IPR027413 (G3DSA:1.10.560.GENE3D); IPR027409 (G3DSA:3.50.7.GENE3D); PTHR11353 (PANTHER); PTHR11353:SF149 (PANTHER); SSF54849 (SUPERFAMILY); SSF48592 (SUPERFAMILY); IPR027409 (SUPERFAMILY)	F:GO:0005524; C:GO:0005737; P:GO:0042026	F:ATP binding; C:cytoplasm; P:protein refolding	NCLIV_016800	putative TCP-1/cpn60 chaperonin family protein	576	TGME49_240600	chaperonin cpn60, putative	667	PF3D7_1232100	60 kDa chaperonin (CPN60)	718	Fully conserved	-	10	NA	383042	386446	0.5141	1770	0.0003022	0.01792	TRUE	-0.9958	-1.99419	972.4	338	1055	331.2	385	352.3	595.3	426.2	1001	345.8	1153	295.2	445.3	338	585.9
augustus_masked-99-processed-gene-0.18-	SRS domain-containing	20	1.21379e-63	55.6	1	C:GO:0016020	C:membrane			IPR028352 (PRINTS); IPR007226 (PFAM); IPR007226 (G3DSA:2.60.40.GENE3D); NON_CYTOPLASMIC_DOMAIN (PHOBIUS); CYTOPLASMIC_DOMAIN (PHOBIUS); TRANSMEMBRANE (PHOBIUS); IPR007226 (SUPERFAMILY); IPR007226 (SUPERFAMILY); TMhelix (TMHMM)	C:GO:0016020	C:membrane	NCLIV_034380	SRS domain-containing protein	379	TGME49_267150	SAG-related sequence SRS38C (SRS38C)	384	NA			Partially conserved	-	99	NA	134069	135196	0.5629	1128	0.0002189	0.01449	TRUE	-1.103	-2.14801	269.3	68.78	145.5	110.4	154.9	75.16	208.7	114.1	434.8	110.4	249.6	154.4	281.1	113.1	322.3
augustus_masked-4-processed-gene-2.29-	major facilitator family	20	0	75.45	2	P:GO:0055085; C:GO:0016021	P:transmembrane transport; C:integral component of membrane			IPR011701 (PFAM); G3DSA:1.20.1250.20 (GENE3D); PTHR20772 (PANTHER); TRANSMEMBRANE (PHOBIUS); CYTOPLASMIC_DOMAIN (PHOBIUS); TRANSMEMBRANE (PHOBIUS); TRANSMEMBRANE (PHOBIUS); CYTOPLASMIC_DOMAIN (PHOBIUS); NON_CYTOPLASMIC_DOMAIN (PHOBIUS); NON_CYTOPLASMIC_DOMAIN (PHOBIUS); CYTOPLASMIC_DOMAIN (PHOBIUS); TRANSMEMBRANE (PHOBIUS); TRANSMEMBRANE (PHOBIUS); TRANSMEMBRANE (PHOBIUS); NON_CYTOPLASMIC_DOMAIN …	P:GO:0055085; C:GO:0016021	P:transmembrane transport; C:integral component of membrane	NCLIV_024670	major facilitator superfamily domain-containing protein	1056	TGME49_263260	transporter, major facilitator family protein	1027	PF3D7_1129900	transporter, putative	609	Fully conserved	-	4	NA	549902	553030	0.6347	3129	0.001218	0.04744	TRUE	-1.192	-2.28469	67.32	39.3	127.3	42.06	90.73	30.53	66.32	34.93	39.19	22.74	78.75	21.2	59.35	16.57	36.93
augustus_masked-32-processed-gene-0.24-	GDA1 CD39 (nucleoside phosphatase) family	20	2.49309e-22	79.1	3	P:GO:0008152; F:GO:0017111; C:GO:0005576	P:metabolic process; F:nucleoside-triphosphatase activity; C:extracellular region	EC:3.6.1; EC:3.6.1.15	Acting on acid anhydrides; Nucleoside-triphosphate phosphatase	no IPS match	no IPS match	no IPS match	NCLIV_067130	hypothetical protein	669	TGME49_278882	GDA1/CD39 (nucleoside phosphatase) family protein	696	NA			Partially conserved	-	32	NA	172736	172936	0.5274	201	4.528e-06	0.008473	TRUE	-1.673	-3.18877	1496	432.3	1946	830.7	3549	710.5	1427	688.2	13560	3895	18740	6519	36140	6002	12370
augustus_masked-38-processed-gene-1.6-	hypothetical protein HHA_266380	10	2.51414e-21	52.6						SIGNAL_PEPTIDE (PHOBIUS); SIGNAL_PEPTIDE_H_REGION (PHOBIUS); SIGNAL_PEPTIDE_C_REGION (PHOBIUS); SIGNAL_PEPTIDE_N_REGION (PHOBIUS); NON_CYTOPLASMIC_DOMAIN (PHOBIUS)	no GO terms	no GO terms	NCLIV_039540	conserved hypothetical protein	979	TGME49_266380	hypothetical protein	1016	NA			Partially conserved	+	38	NA	318975	322466	0.6586	3492	0.0008444	0.03727	TRUE	-1.838	-3.57514	52.36	15.72	36.38	10.52	59.75	12.92	21.03	8733	27.31	8152	20.16	4.75	35.02	6281	10.49
maker-4-augustus-gene-5.34-	WD G-beta repeat-containing	20	0	62.1	1	F:GO:0005515	F:protein binding			IPR001680 (SMART); IPR015943 (G3DSA:2.130.10.GENE3D); IPR001680 (PFAM); PTHR19924 (PANTHER); IPR019775 (PROSITE_PATTERNS); IPR001680 (PROSITE_PROFILES); IPR001680 (PROSITE_PROFILES); IPR017986 (PROSITE_PROFILES); IPR017986 (SUPERFAMILY)	F:GO:0005515	F:protein binding	NCLIV_025210	conserved hypothetical protein	1185	TGME49_262650	WD domain, G-beta repeat-containing protein	1229	PF3D7_1311200	alternative splicing regulator, putative	527	Fully conserved	+	4	NA	1009660	1016345	0.66	3735	0.0007609	0.03454	TRUE	-2.015	-4.04181	22.44	17.69	72.76	10.52	141.6	19.96	14.56	13.39	10.94	8574	37.7	4441	77.61	9076	6.79
maker-42-augustus-gene-1.23-	ATP-dependent metallopeptidase subfamily	20	0	78.3	5	F:GO:0005524; C:GO:0016020; P:GO:0006508; F:GO:0004222; F:GO:0008568	F:ATP binding; C:membrane; P:proteolysis; F:metalloendopeptidase activity; F:microtubule-severing ATPase activity	EC:3.4.24; EC:3.6.1; EC:3.6.1.3; EC:3.6.1.15; EC:3.6.4.3	Acting on peptide bonds (peptidases); Acting on acid anhydrides; Adenosinetriphosphatase; Nucleoside-triphosphate phosphatase; Microtubule-severing ATPase	Coil (COILS); Coil (COILS); Coil (COILS); IPR003593 (SMART); G3DSA:1.10.8.60 (GENE3D); IPR000642 (PFAM); IPR005936 (TIGRFAM); IPR003959 (PFAM); IPR027417 (G3DSA:3.40.50.GENE3D); PTHR23076:SF82 (PANTHER); PTHR23076 (PANTHER); IPR003960 (PROSITE_PATTERNS); CYTOPLASMIC_DOMAIN (PHOBIUS); TRANSMEMBRANE (PHOBIUS); NON_CYTOPLASMIC_DOMAIN (PHOBIUS); CYTOPLASMIC_DOMAIN (PHOBIUS); TRANSMEMBRANE (PHOBIUS); …	F:GO:0005524; P:GO:0006508; C:GO:0016020; F:GO:0004222	F:ATP binding; P:proteolysis; C:membrane; F:metalloendopeptidase activity	NCLIV_064680	ATP-dependent metalloprotease involved in cell division, related	996	TGME49_300020	ATP-dependent metallopeptidase HflB subfamily protein	1021	PF3D7_1464900	ATP-dependent zinc metalloprotease FTSH, putative	706		+	42	NA	256329	263298	0.6677	3274	3.337e-05	0.02209	TRUE	-2.673	-6.37754	149.6	29.48	109.1	21.03	316.4	31.71	42.06	17.47	83.22	16.3	64.51	10.13	197.8	16.44	22.38
[truncated: 1 more columns]
